# Supplementary material for: Tin(ii) chloride assisted synthesis of N-protected γ-amino β-keto esters through semipinacol rearrangement
Source: Royal Society of Chemistry journal article supplement (doi:10.1039/c0ob00199f), 2010-01-01

## Supporting Information for

### **Tin(II) chloride Assisted Synthesis of *N*-protected $\gamma$ - amino $\beta$ -keto esters through Semipinacol Rearrangement.**

Anupam Bandyopadhyay, Neha Agarwal, Sachidanand M. Mali, Sandip V. Jadhav and Hosahudya N. Gopi\*

Department of Chemistry, Indian Institute of Science Education and Research, Garware Circle, Pashan, Pune-411021, India.

[hn.gopi@iiserpune.ac.in](mailto:hn.gopi@iiserpune.ac.in)

### **General Experimental Details**

All amino acids, ethyl diazoacetate, LAH, DiPEA, Tin(II) chloride, TFA, DMP, Cs<sub>2</sub>CO<sub>3</sub>, Cbz-Cl were purchased from Aldrich. THF, DCM, DMF, were purchased from Merck. Isobutyl chloroformate, NaBH<sub>4</sub>, HBTU, HOBT, Methanesulfonic acid, di-tert-butyl dicarbonate, Fmoc-OSu, 3-Methoxy phenol, Benzyl bromide were obtained from spectrochem and used without further purification. THF and DiPEA were dried over sodium and distilled immediately prior to use. Column chromatography were performed on Merck silica gel (120-200 mesh) and flash chromatography (Combi Flash *R<sub>f</sub>*). The <sup>1</sup>H spectra were recorded Brucker 500 MHz (or 125 MHz for <sup>13</sup>C) and Jeol 400 MHz (or 100 MHz for <sup>13</sup>C) spectrometers using residual solvents signals as an internal reference (CDCl<sub>3</sub>  $\delta_{\text{H}}$ , 7.24 ppm,  $\delta_{\text{C}}$  77.0 ppm). The chemical shifts ( $\delta$ ) are reported in *ppm* and coupling constants in (*J*) in Hz. Specific rotations were recorded using MeOH as a solvent (Rudolph Analytical Research). UV and Fluorescence data were performed on Thermo Scientific and Fluorolog (Horiba Jobin Yvin) spectrophotometers, respectively. High-resolution mass spectra obtained from HRMS-ESI (waters), LCMS/MS (waters) and MALDI TOF/TOF (Applied Biosciences).

### **General procedure to make Cbz-/Boc-Weinreb amides**

We used the reported procedure for the synthesis of Weinreb amides.<sup>1,2</sup> In a typical experiment, the protected amino acid (15 mmol) was dissolved in dry DCM (30 mL) and then treated

with HBTU (15 mmol, 5.68 g) and DiEPA (45 mmol, 4.54 g), the reaction mixture was cooled to 0 °C. After stirring for 5 min hydrochloride salt (18 mmol, 1.74g) of *N*, *O*-dimethylhydroxylamine was added. The progress of the reaction was monitored by TLC. After completion of the reaction (roughly 2hrs), DCM was evaporated and the residue was diluted with 150 mL of ethyl acetate and washed with 5% HCl (5 % by vol. in water, 2 x 30 mL), 10 % sodium carbonate solution in water (2 x 40 mL) and followed by brine (30 mL). The organic layer was dried over Na<sub>2</sub>SO<sub>4</sub> and evaporated under reduced pressure. The pure Boc-Weinreb amides were isolated after column chromatography using EtOAc/ pet.ether (60-80 °C) solvent system.

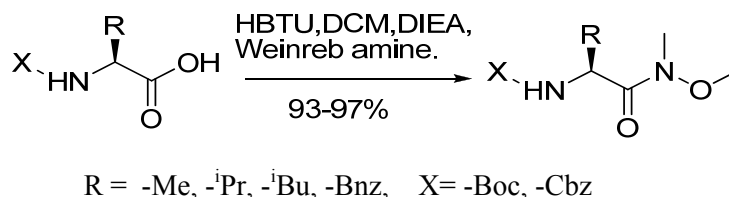

### General procedure to make Cbz-/Boc-amino aldehydes<sup>1,2</sup>

The *N*-Protected Weinreb amide (15 mmol) was dissolved in 120 mL of dry THF under N<sub>2</sub> atmosphere, cooled to 0 °C, and then LiAlH<sub>4</sub> (18.75 mmol, 0.712 g) was added slowly during 10 min. Reaction was stirred for another 20 min to complete the reaction. Reaction was quenched with 5% HCl (5 % by volume in water) very slowly in ice cool condition (pH 3). THF was evaporated from the reaction mixture and the *N*-protected amino aldehyde was extracted with ether (3 x 80 mL). Combined ether layer was washed with brine (40 mL) and dried over anhydrous Na<sub>2</sub>SO<sub>4</sub>. Organic layer was concentrated under reduced pressure to get oily product and immediately used for next step without purification.

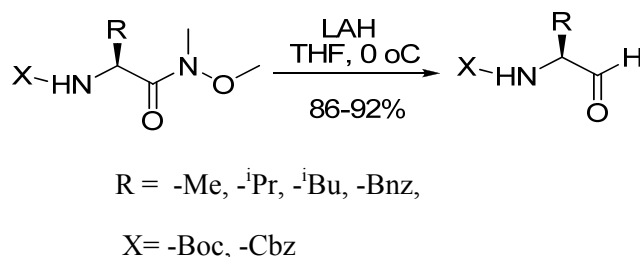

**Compounds**

**Yield**

|                            |                 |
|----------------------------|-----------------|
| Boc-ala-H ( <b>3a</b> )    | 89%, ( 2.02 g)  |
| D-Boc-ala-H ( <b>3b</b> )  | 90%, ( 2.05g)   |
| Boc-val-H ( <b>3c</b> )    | 90%, ( 2.47 g)  |
| Boc-leu-H ( <b>3d</b> )    | 90%, ( 2.58 g)  |
| Boc-Pheala-H ( <b>3e</b> ) | 92%, ( 3.06 g)  |
| Boc-Ileu-H ( <b>3f</b> )   | 86%, ( 2.77 g ) |
| Cbz-ala-H ( <b>3g</b> )    | 88%, ( 2.73g )  |
| Cbz-val-H ( <b>3h</b> )    | 91%, ( 3.20g )  |
| Cbz-leu-H ( <b>3i</b> )    | 87%, ( 3.25 g ) |

### General procedure for the synthesis of Fmoc-amino alcohol<sup>3-5</sup>

The Fmoc-protected amino acid (10 mmol) was dissolved in dry THF ( 20 mL) under nitrogen atmosphere, and cooled -15 °C , and then treated with DiPEA (10.2 mmol, 1.32g ) followed by isobutyl chloroformate (10 mmol, 1.366g ). White hydrochloride salt of DiPEA was precipitated out immediately after addition of isobutyl chloroformate. The reaction was continued to stir for another 10 min. The hydrochloride salt of DiPEA was filtered and washed with THF (2 × 10 mL). The filtrate was again cooled to -15 °C under nitrogen atmosphere, and then a solution of NaBH<sub>4</sub> (20 mmol, 720 mg ) in 3mL of water was added with vigorous stirring. Immediate evolution of gas was observed after the addition. THF was evaporated from the reaction mixture and diluted with EtOAc (150 mL). The organic layer was washed with 5% HCl (5 % by volume in water, 2 × 50 mL ), 5 % sodium carbonate solution in water (2 x50 mL), followed by brine (50 mL). Organic layer was dried over anhydrous Na<sub>2</sub>SO<sub>4</sub> and evaporated under reduced pressure. The Fmoc-alcohol was purified using column chromatography and used for the next step.

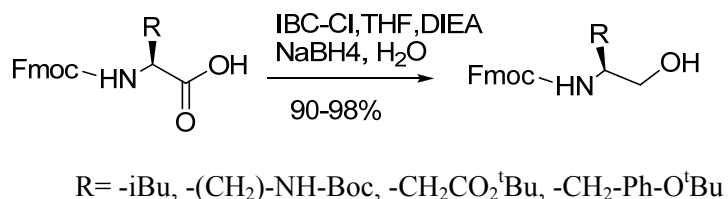

| <u>Product</u>                                                                                           | <u>Yield</u> |
|----------------------------------------------------------------------------------------------------------|--------------|
| ( <i>S</i> )-(9H-fluoren-9-yl)methyl (1-hydroxy-4-methylpentan-2-yl)carbamate                            | 92% (3.123g) |
| ( <i>S</i> )- <i>tert</i> -butyl 3-(((9H-fluoren-9-yl)methoxy)carbonyl)amino)-4-hydroxybutanoate         | 90% (3.572g) |
| ( <i>S</i> )-(9H-fluoren-9-yl)methyl <i>tert</i> -butyl (6-hydroxyhexane-1,5-diyl)dicarbamate            | 98% (4.443g) |
| ( <i>S</i> )-(9H-fluoren-9-yl)methyl (1-(4-( <i>tert</i> -butoxy)phenyl)-3-hydroxypropan-2-yl) Carbamate | 91% (4.045g) |

### General procedure for the synthesis of Fmoc-amino aldehydes<sup>3-6</sup>

The Fmoc-amino alcohol (5mmol) was dissolved in 50 mL of DCM at rt and then 2.1 g (7.5mmol) Dess-Martin periodinane (DMP) was added. Resulting reaction mixture was stirred for 1hr, the progress of the reaction was monitored by TLC. Reaction mixture was diluted with diethylether (50mL) followed by 10% Na<sub>2</sub>CO<sub>3</sub> solution (50mL) with vigorous stirring. After 10 min organic layer was separated and washed with 10% Na<sub>2</sub>CO<sub>3</sub> solution (50 mL × 2) and brine. Organic layer was dried over anhydrous Na<sub>2</sub>SO<sub>4</sub> and concentrated under reduced pressure to get Fmoc-amino aldehyde and it was immediately used in the next step without purification.

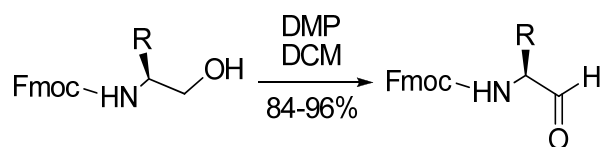

R = -iBu, -(CH<sub>2</sub>)<sub>2</sub>-NH-Boc, -CH<sub>2</sub>CO<sub>2</sub><sup>t</sup>Bu, -CH<sub>2</sub>-Ph-O<sup>t</sup>Bu

| <u>Compound</u>                                                                                                 | <u>Yield</u>  |
|-----------------------------------------------------------------------------------------------------------------|---------------|
| ( <i>S</i> )-(9H-fluoren-9-yl)methyl (4-methyl-1-oxopentan-2-yl)carbamate ( <b>6a</b> )                         | 92% (1.55gm)  |
| ( <i>S</i> )- <i>tert</i> -butyl 3-(((9H-fluoren-9-yl)methoxy)carbonyl)amino)-4-oxobutanoate ( <b>6b</b> )      | 88% (1.735gm) |
| ( <i>S</i> )-(9H-fluoren-9-yl)methyl <i>tert</i> -butyl (6-oxohexane-1,5-diyl)dicarbamate ( <b>6c</b> )         | 96% (2.164gm) |
| ( <i>S</i> )-(9H-fluoren-9-yl)methyl(1-(4-( <i>tert</i> -butoxy)phenyl)-3-oxopropan-2-yl)carbamate( <b>6d</b> ) | 84% (1.858gm) |

## References

- (1) J. –A, Fehrentz, B. Castro, *Synthesis*, 1983, 676.
- (2) S. Benetti, C. D. Risi, P. Marchetti, G. P. Pollini, V. Zanirato, *Synthesis*, 2002, 331-338.
- (3) J. J. Wen, C. M. Crews, *Tetrahedron: Asymm.* 1998, **9**, 1855
- (4) M. Rodriguez, M. Llinares, S. Doulut, A. Hintz, J. Martinez, *Tetrahedron Lett.* 1991, **32**, 923.
- (5) Q. Wang, R. J. Linhardt, *J. Org. Chem.* 2003, **68**, 2668.
- (6) D. B. Dess, J. C. Martin, *J. Org. Chem.* 1983, **43**, 4155.

## Copies of $^1\text{H}$ , $^{13}\text{C}$ NMR and Mass Spectra for Products

4a

AB -BOC-Ala-BK

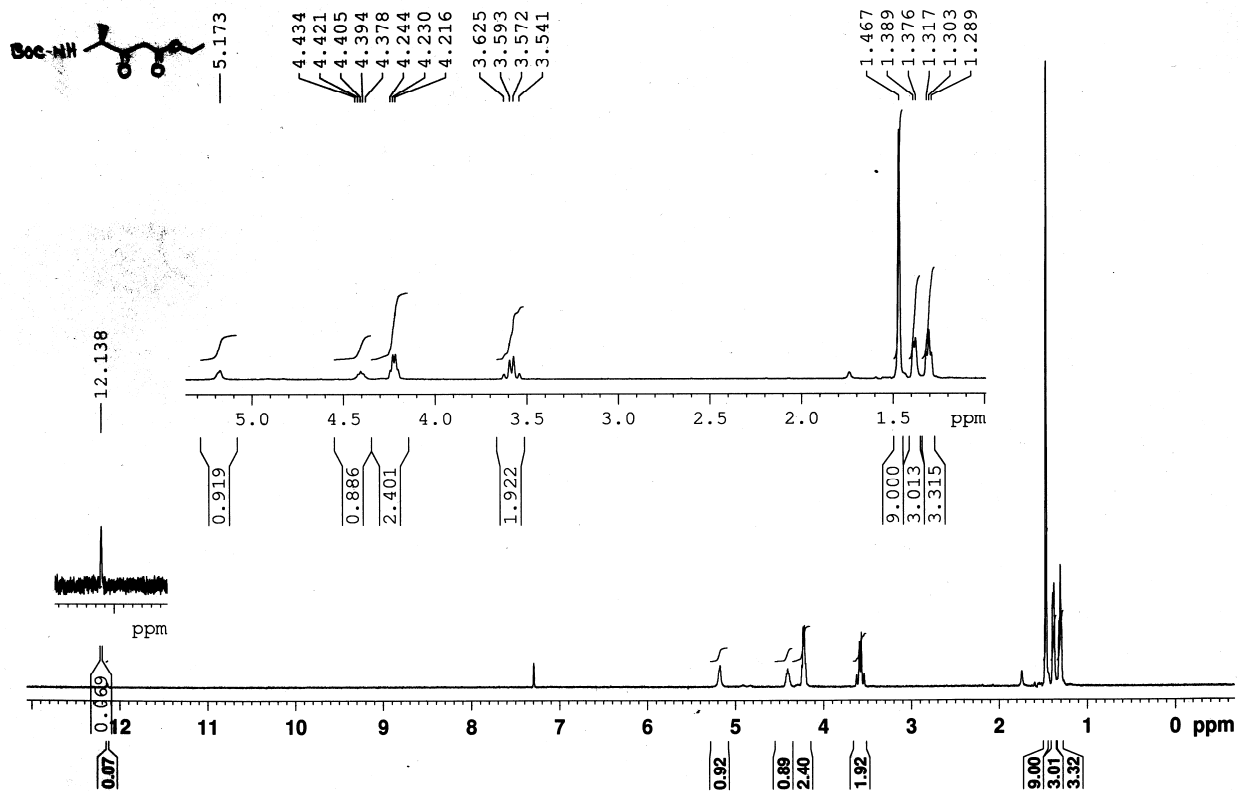

## 4a

AB -BOC-Ala-BK  
13C CDC13  
120509-30

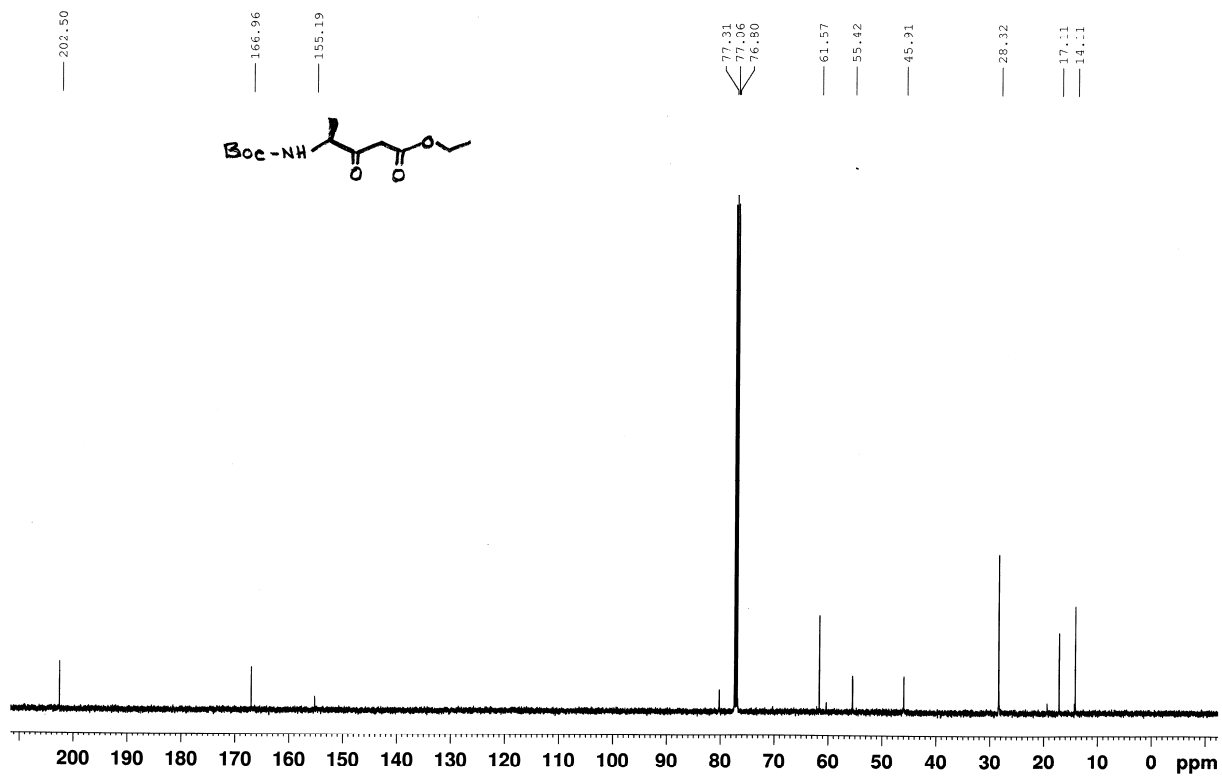

4a

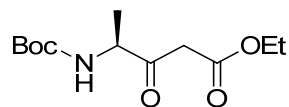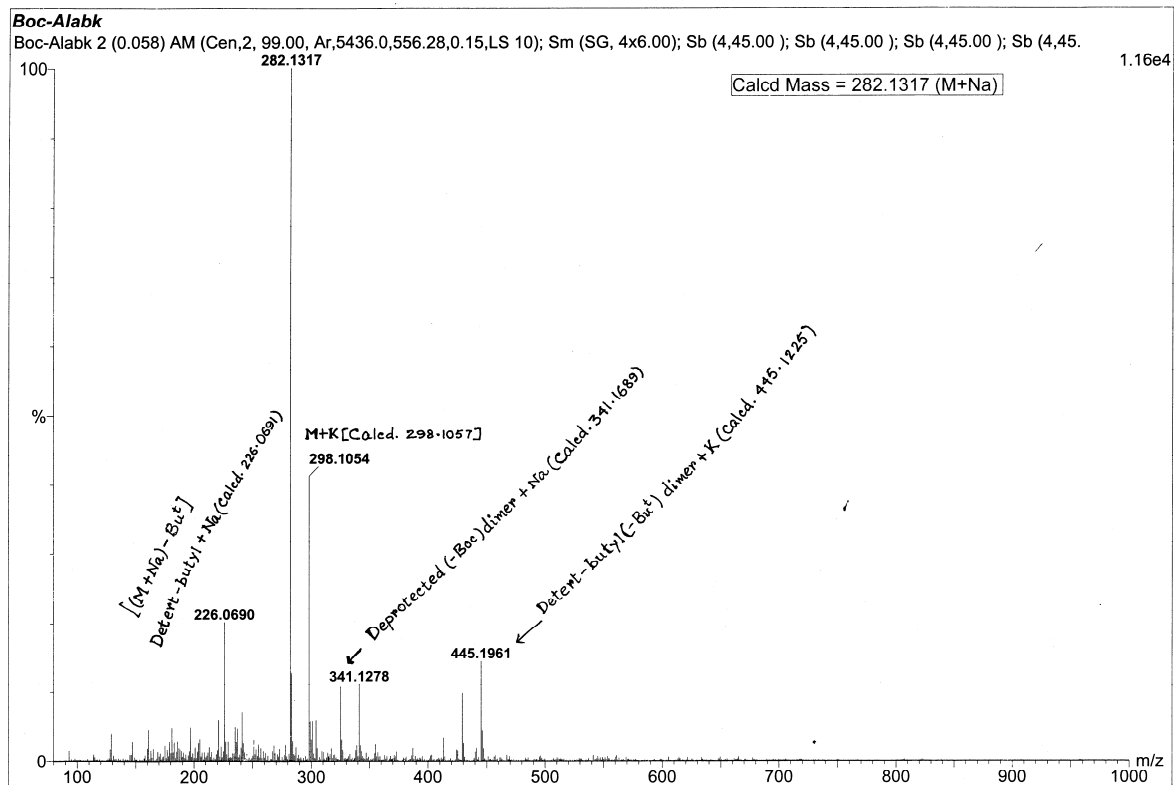



4b

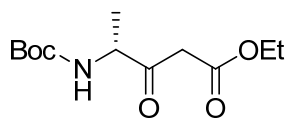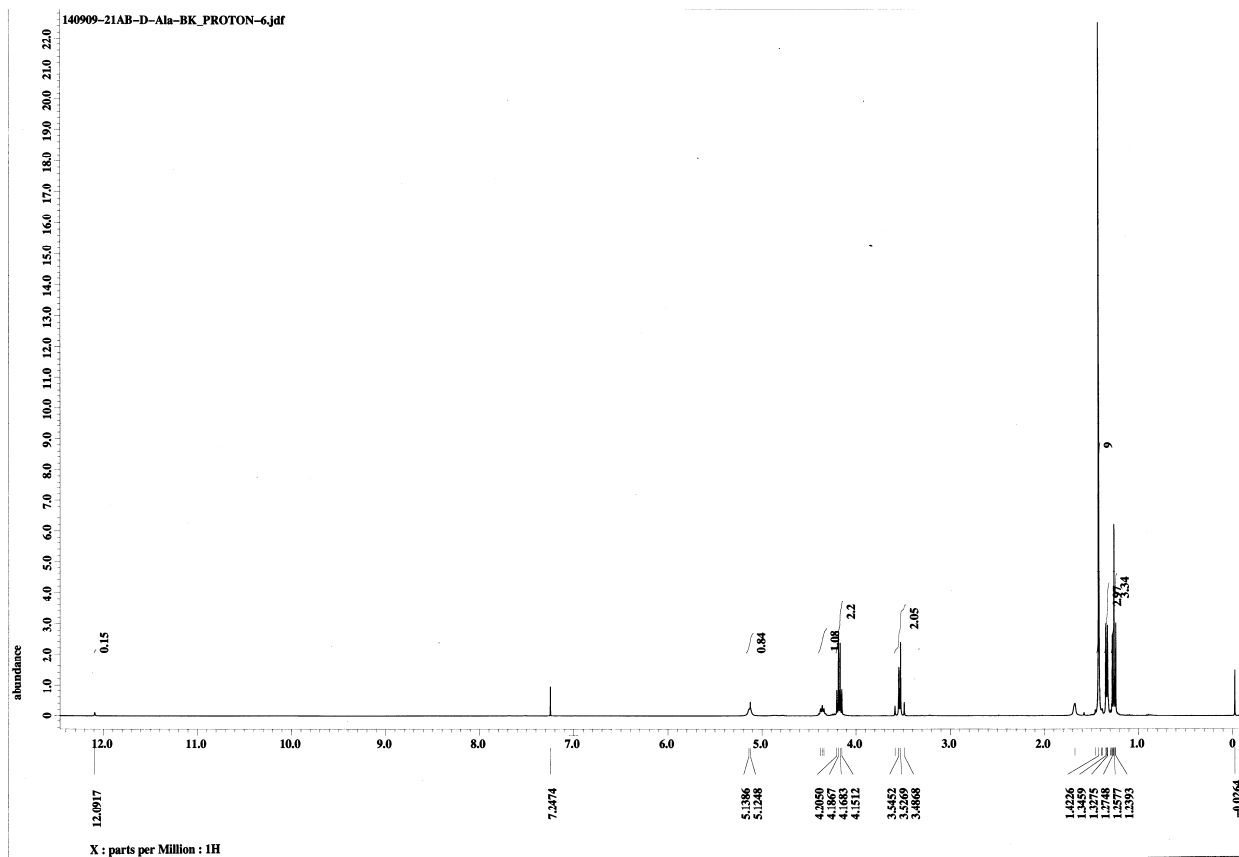

4b

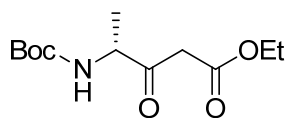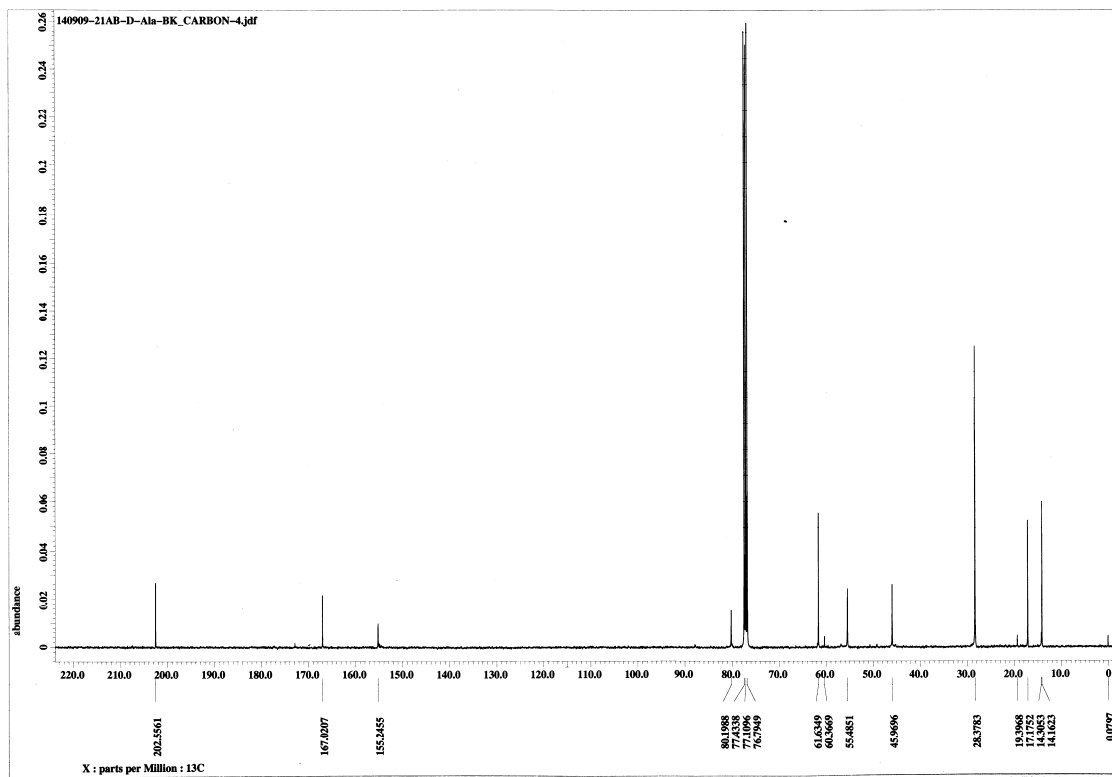

### 4c

AB Boc-Val-BK  
1H CDCl3  
110509-67

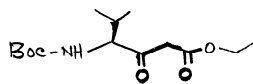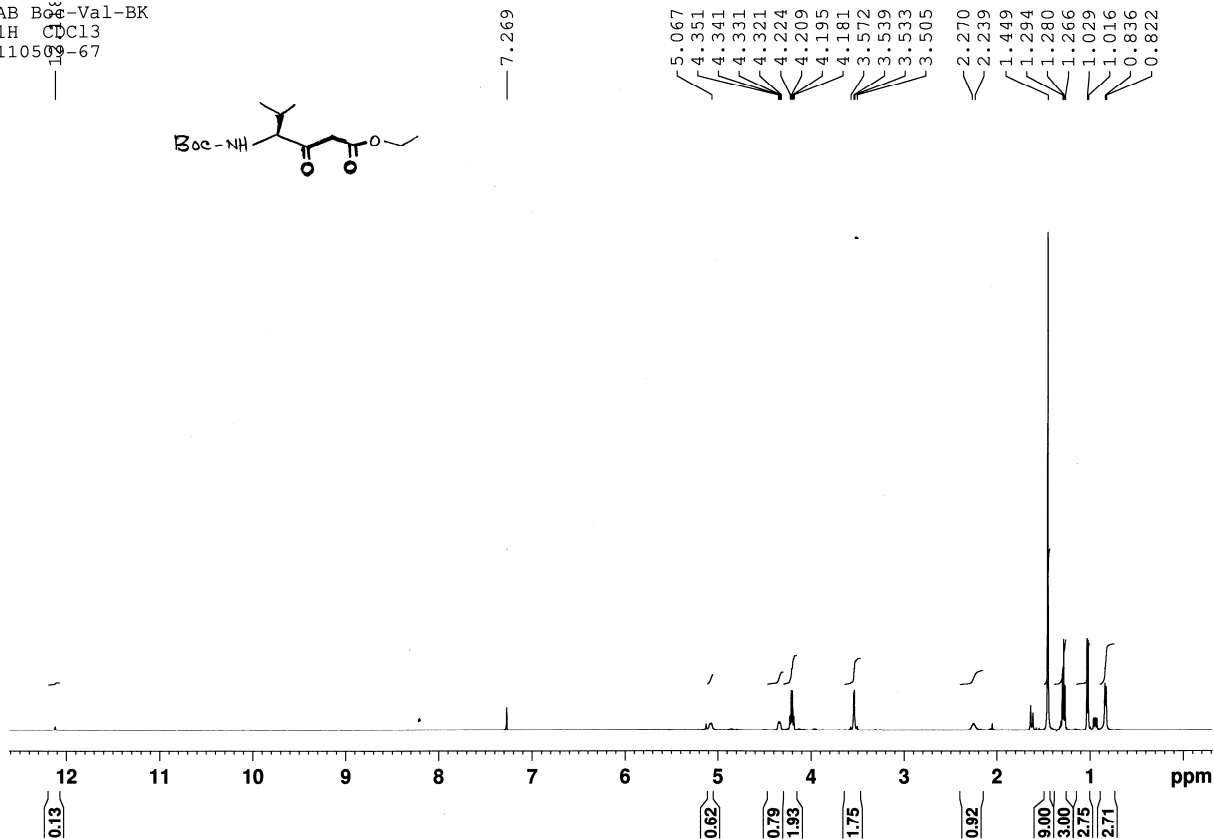

4c

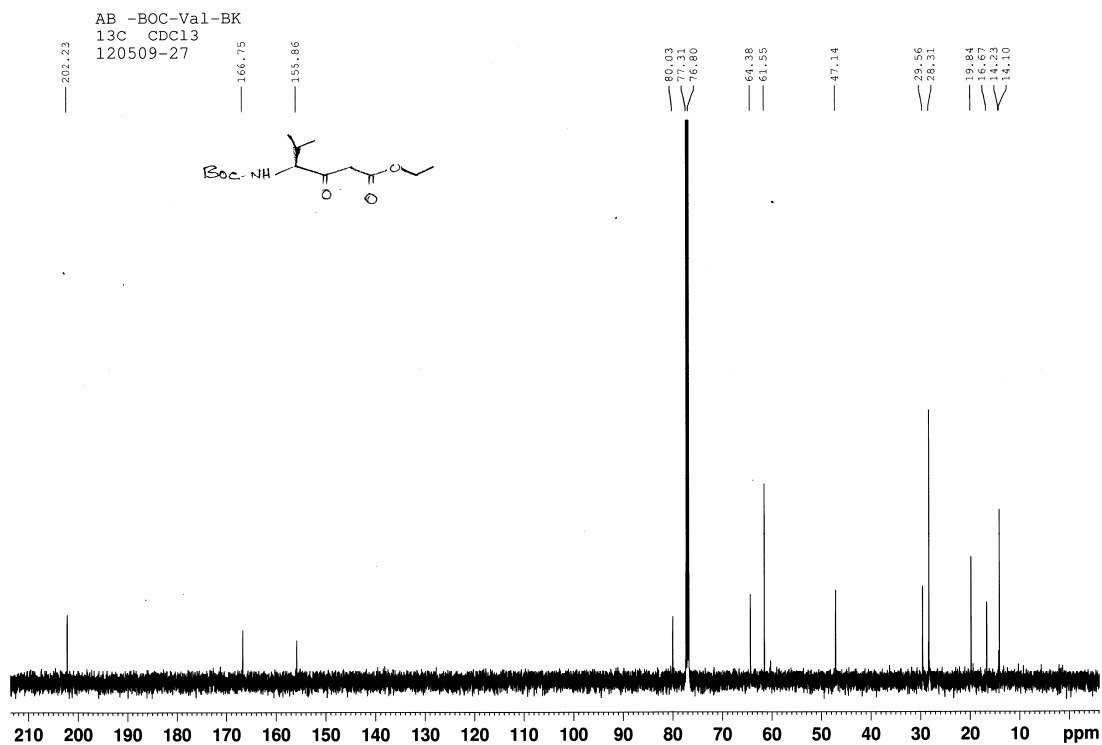

4c

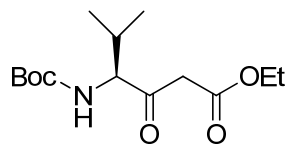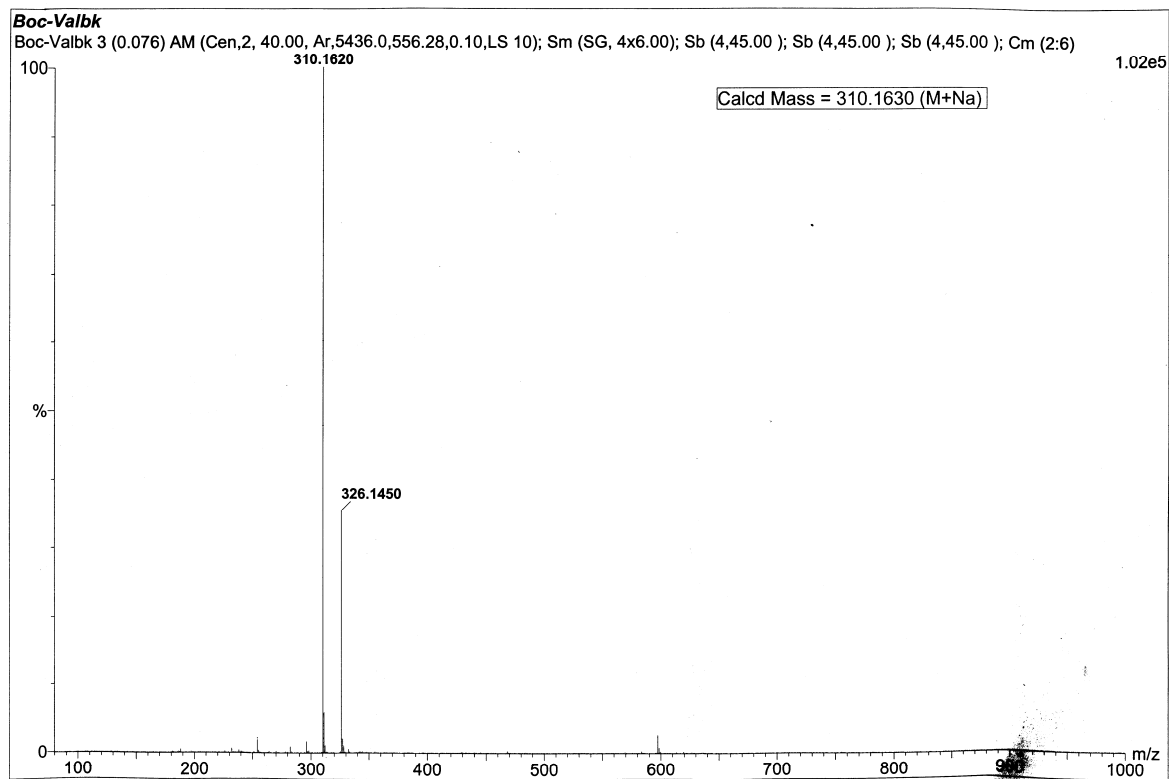

## 4d

AB -BOC-Leu-BK

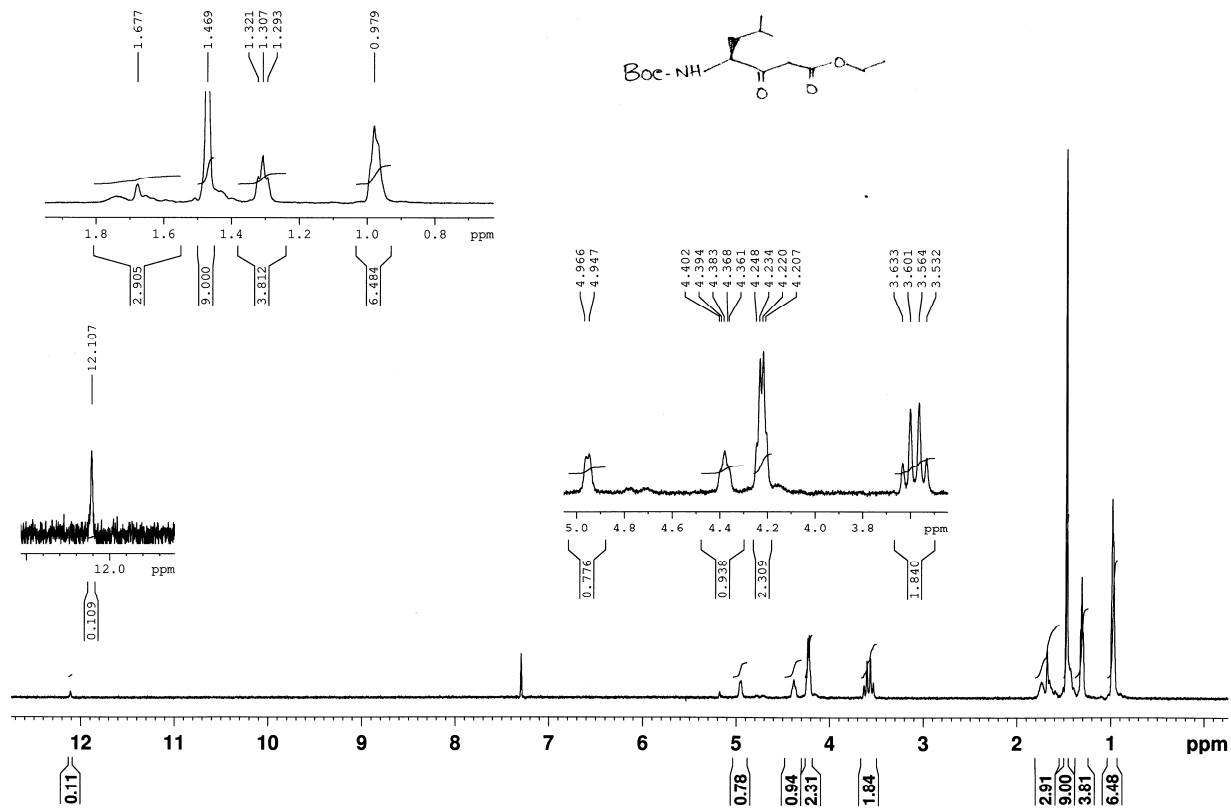

### 4d

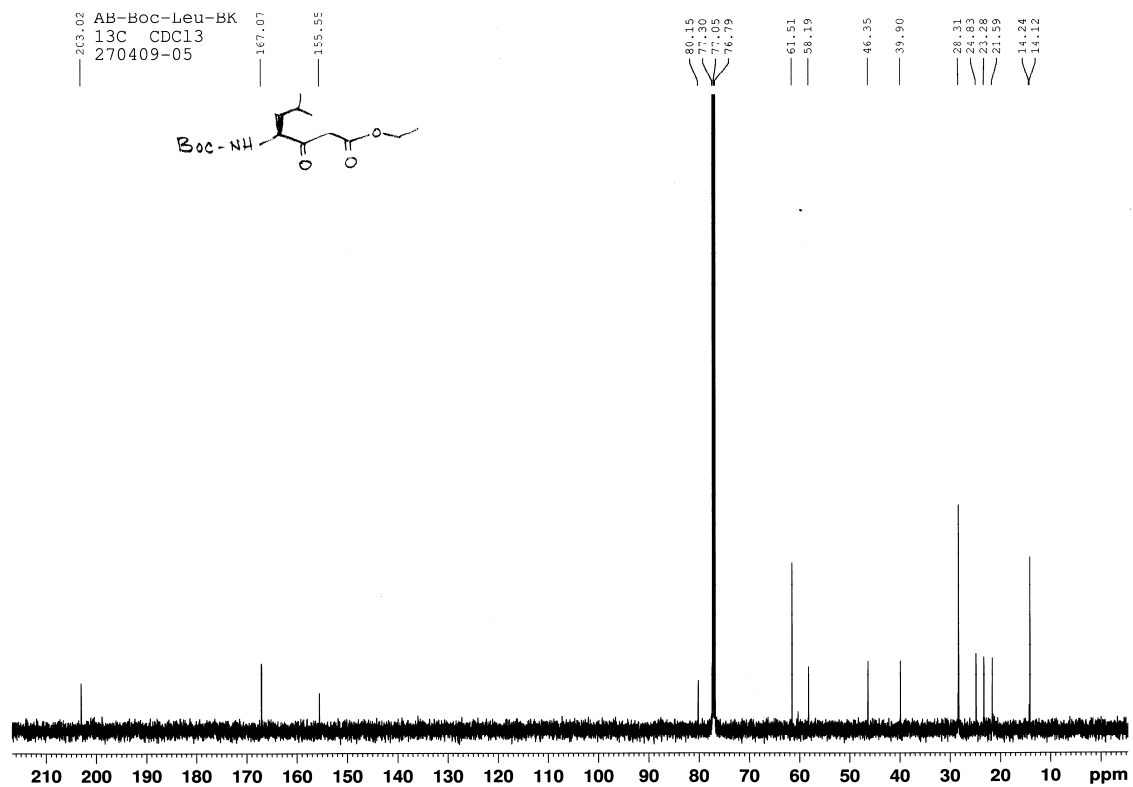

4d

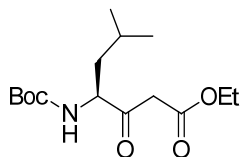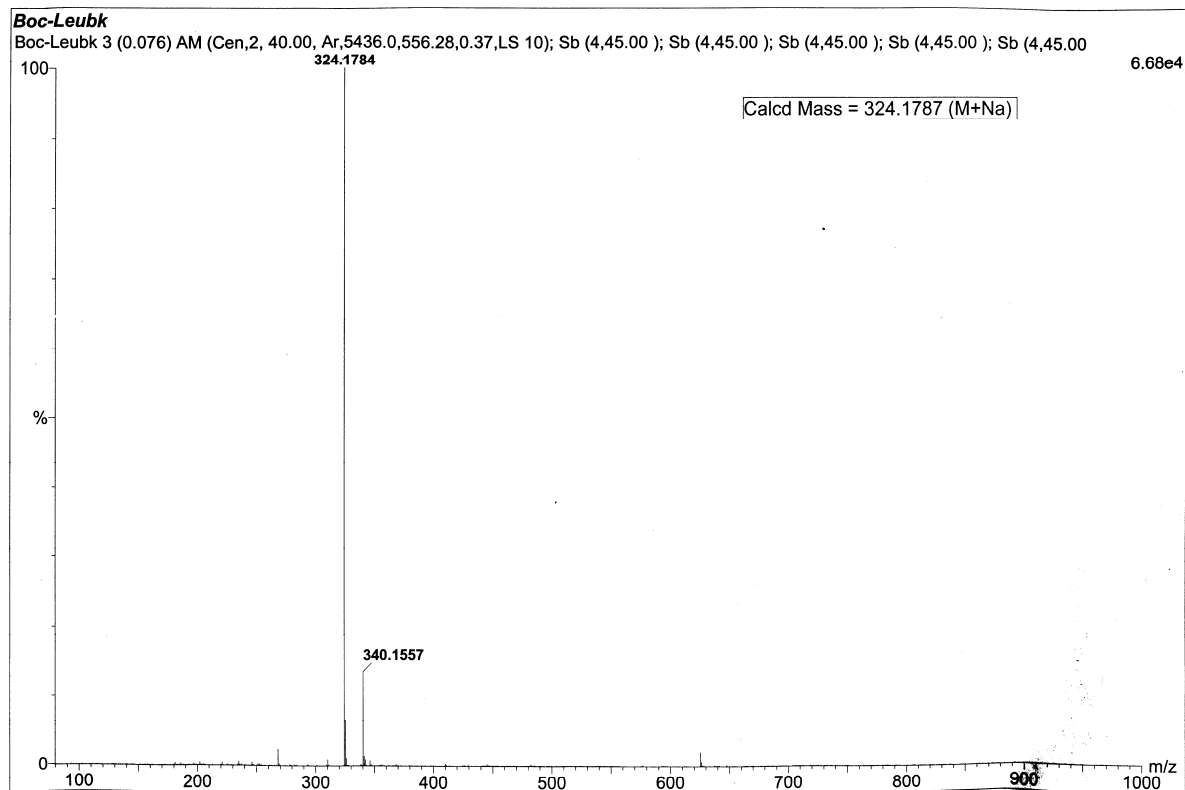



4e

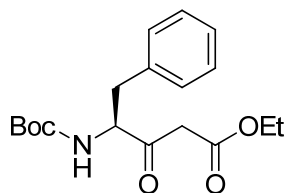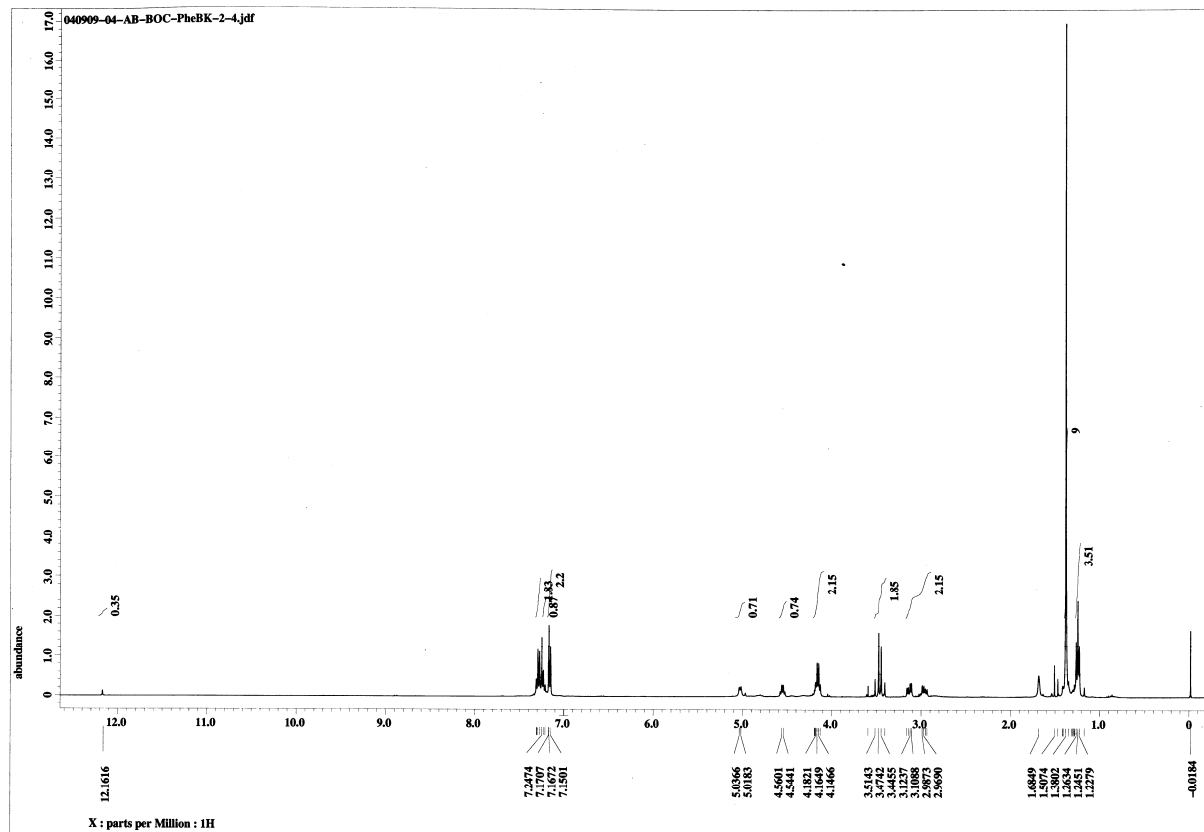

### 4e

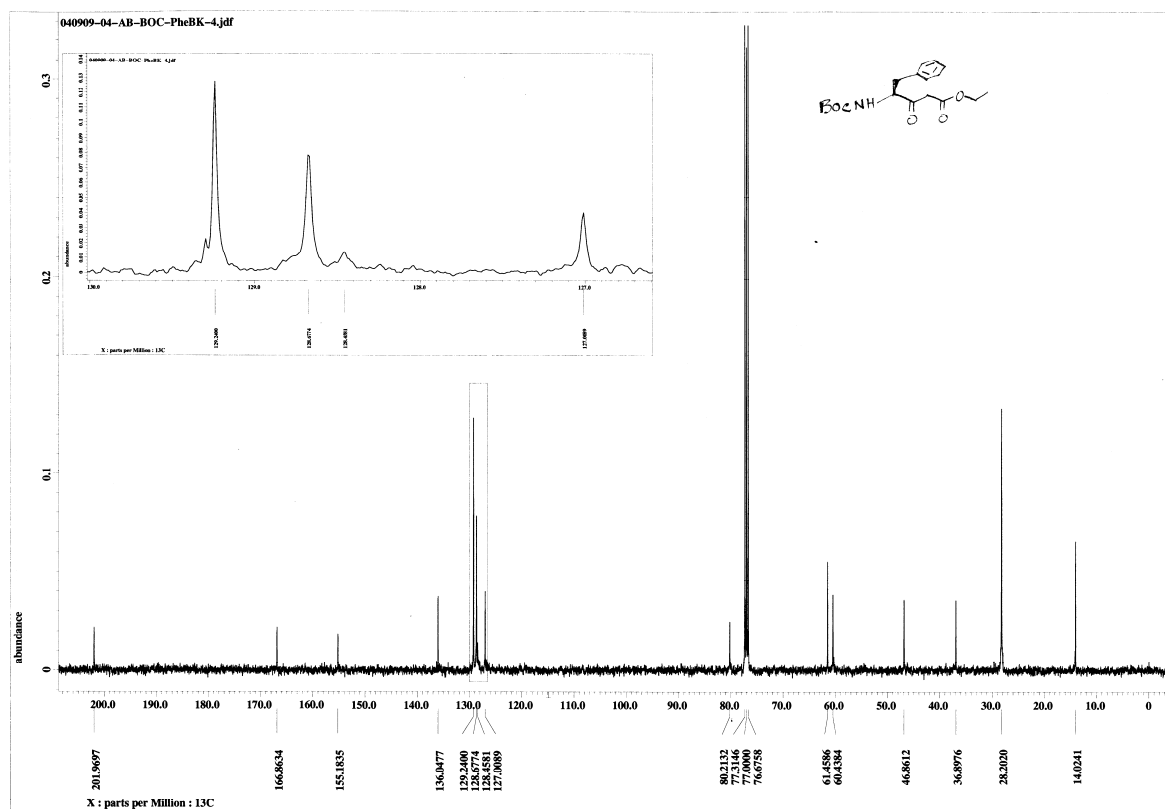

4e

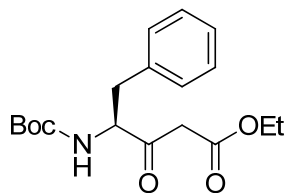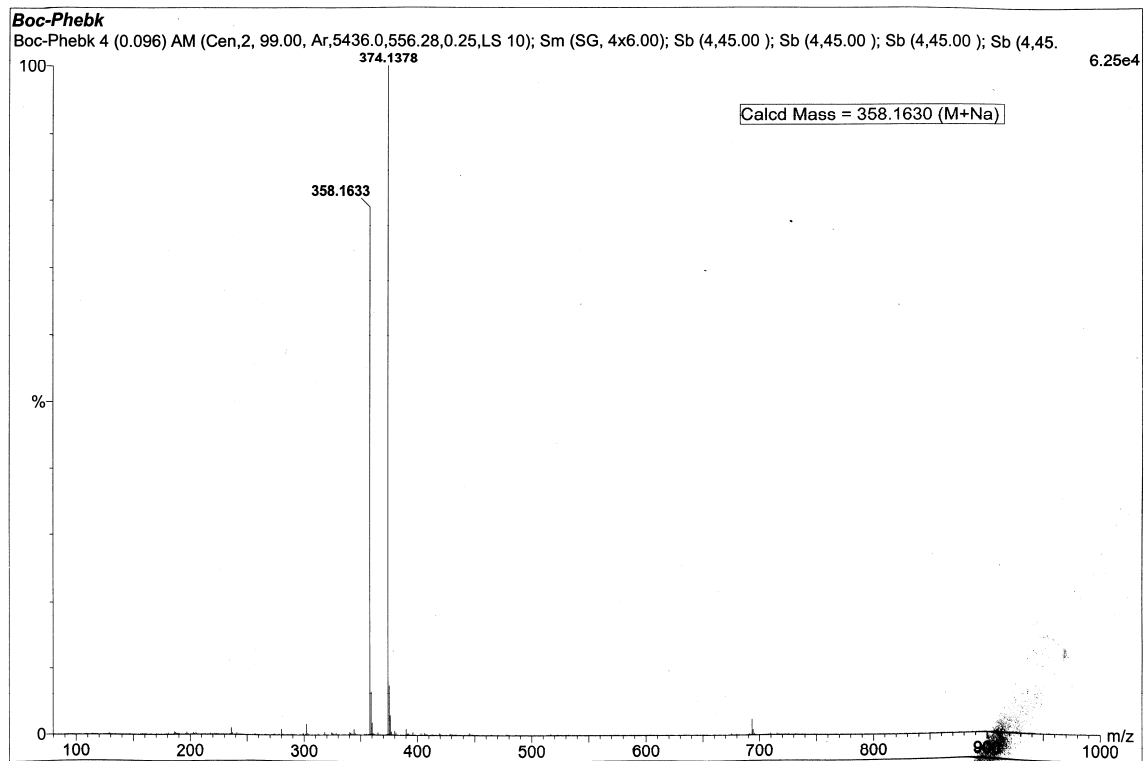

4f

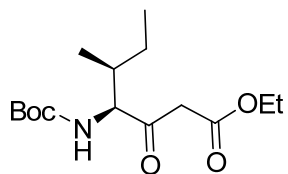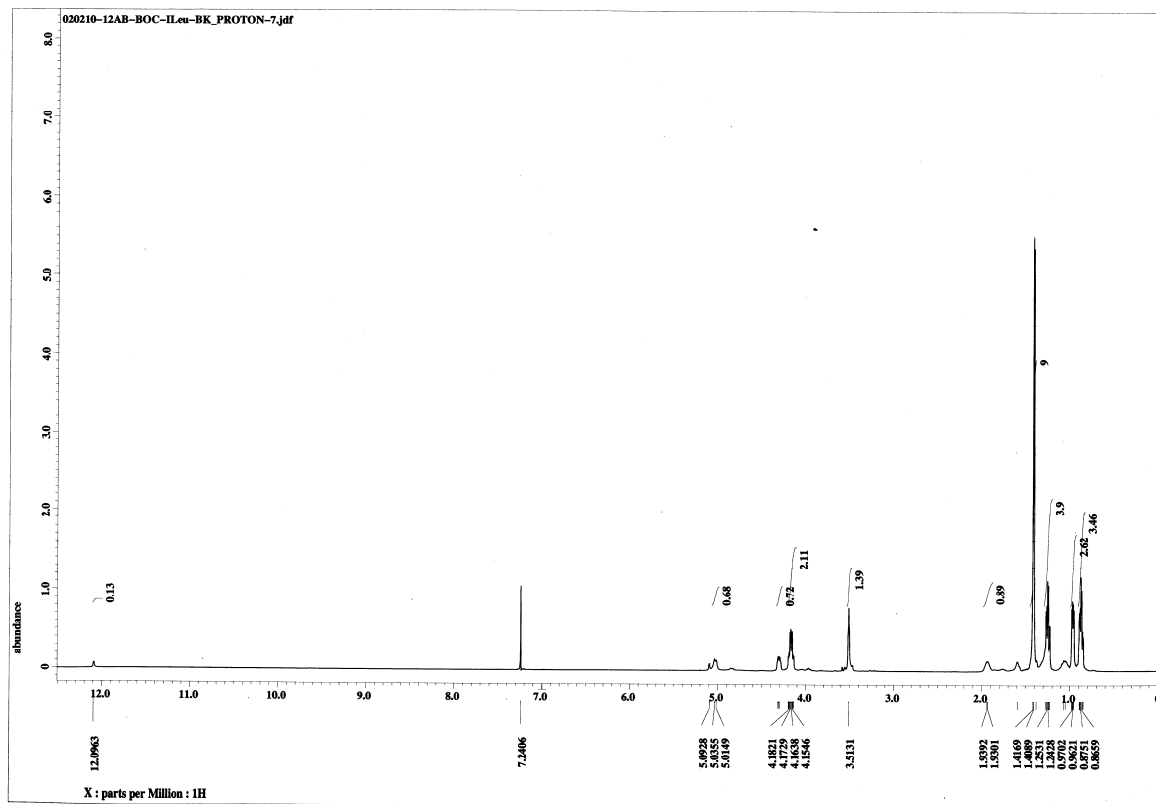

4f

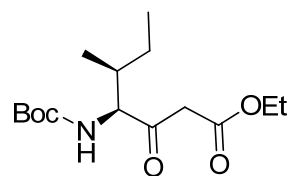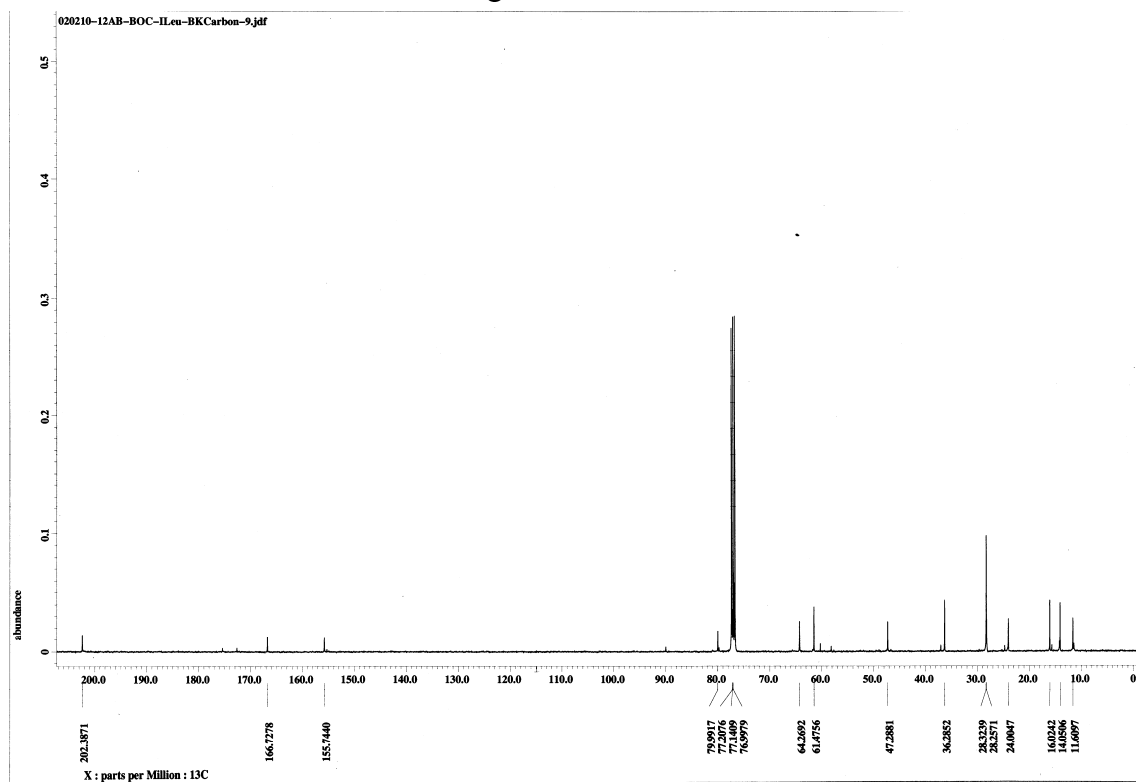

4f

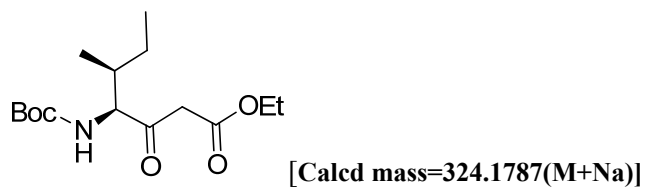

Boc-Tleu-BK

Spectrum Report

Final - Shots 1050 - MAYURA291209; Run #31; Label J2

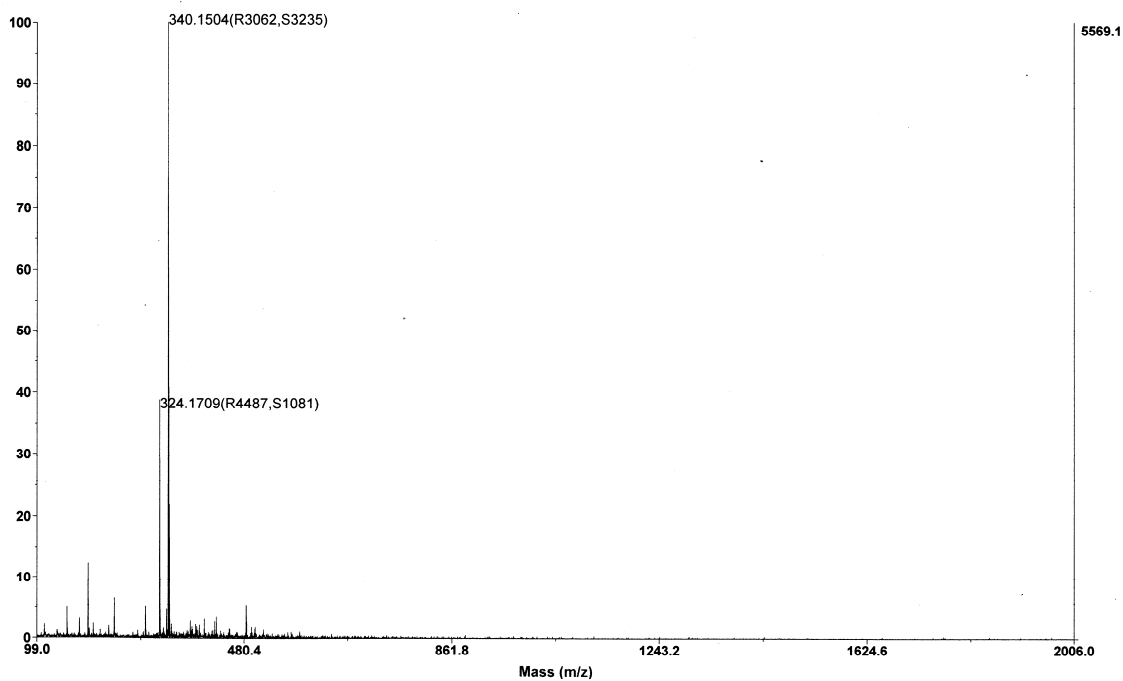

mayuraMAYURA291209 Label J2 Run # 31

Page 1

2/18/2010 12:10:56 PM

# 4g

AB -Z-Ala-BK

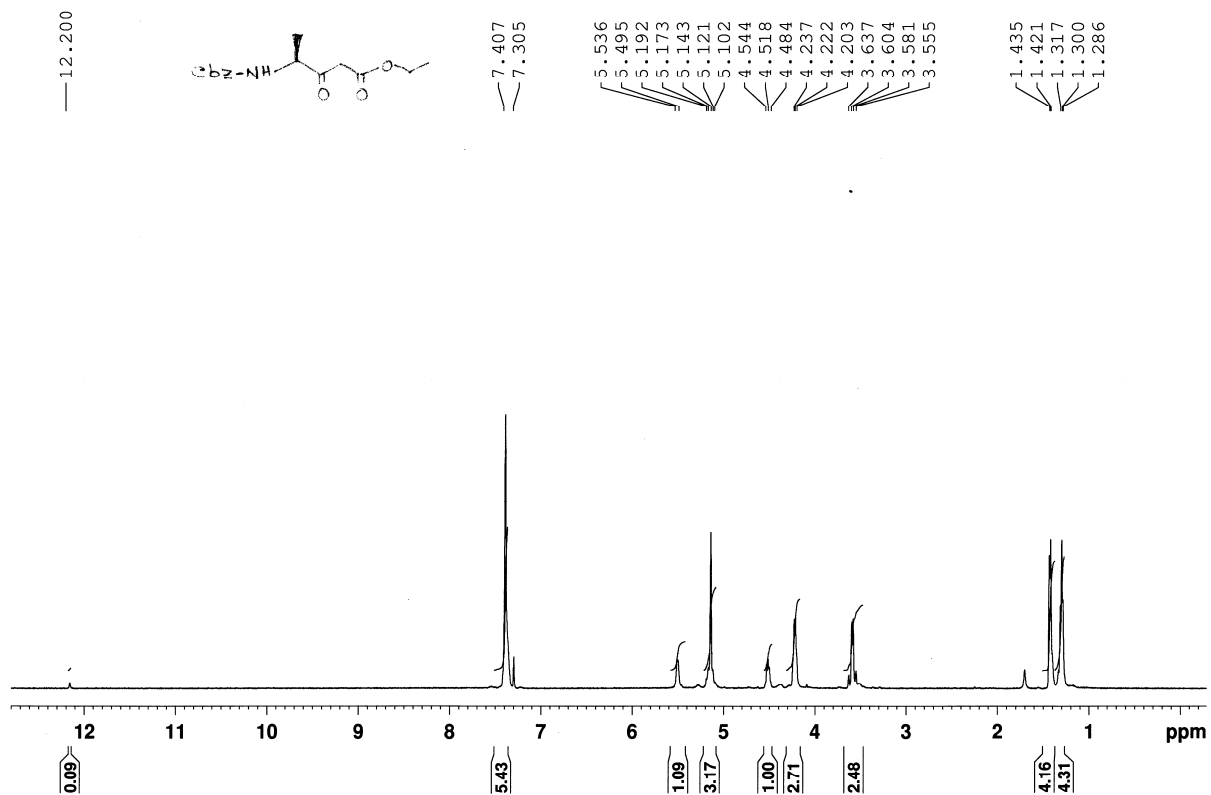

# 4g

AB-Z-Ala-BK  
13C CDC13  
270409-01

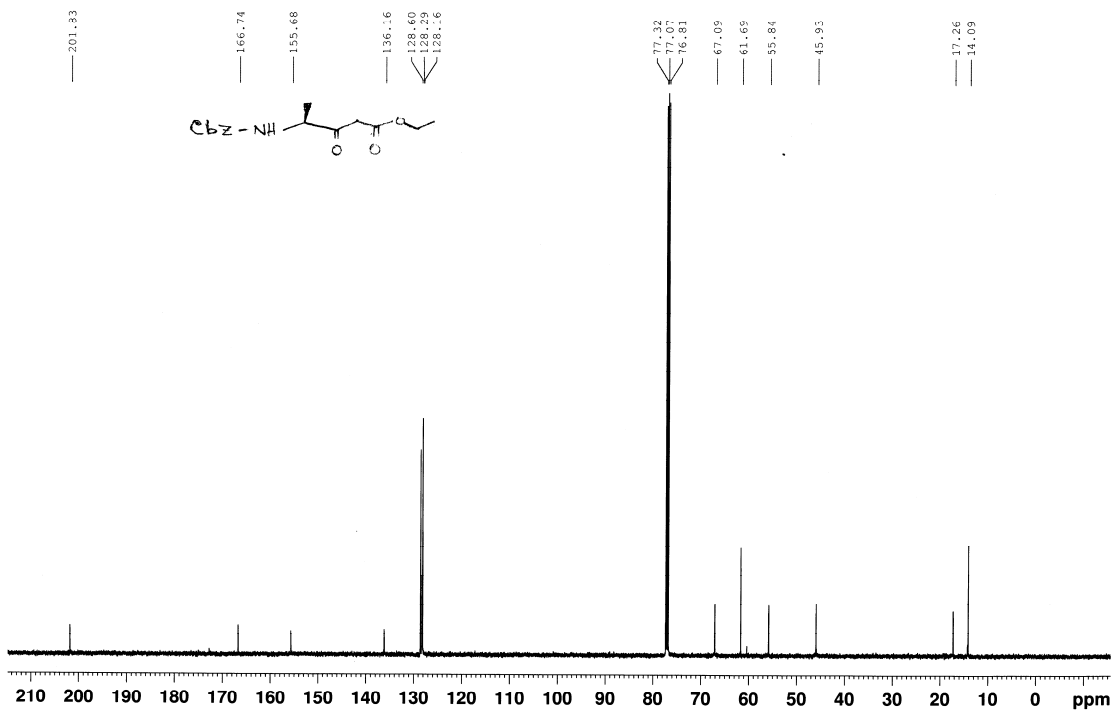



4g

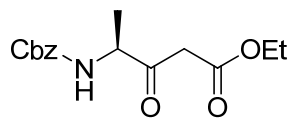

[Calcd. Mass=332.0900(M+K)]

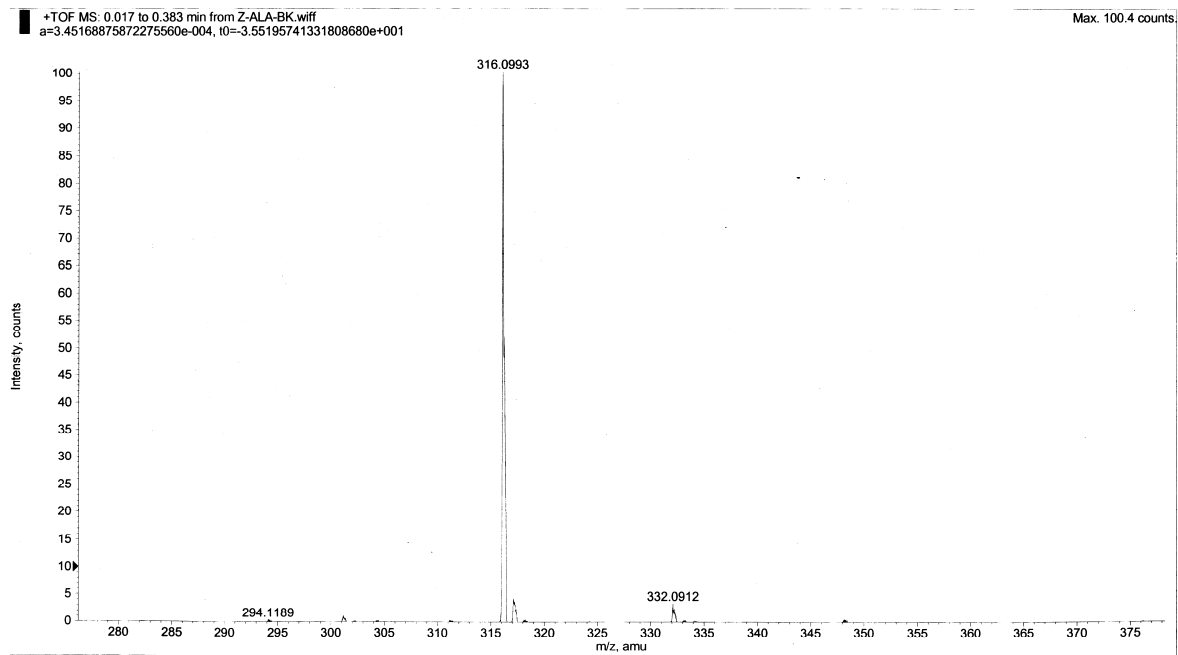

### 4h

AB-Cbz-VAL-BK  
1H CDC13  
120509-74

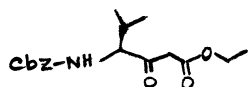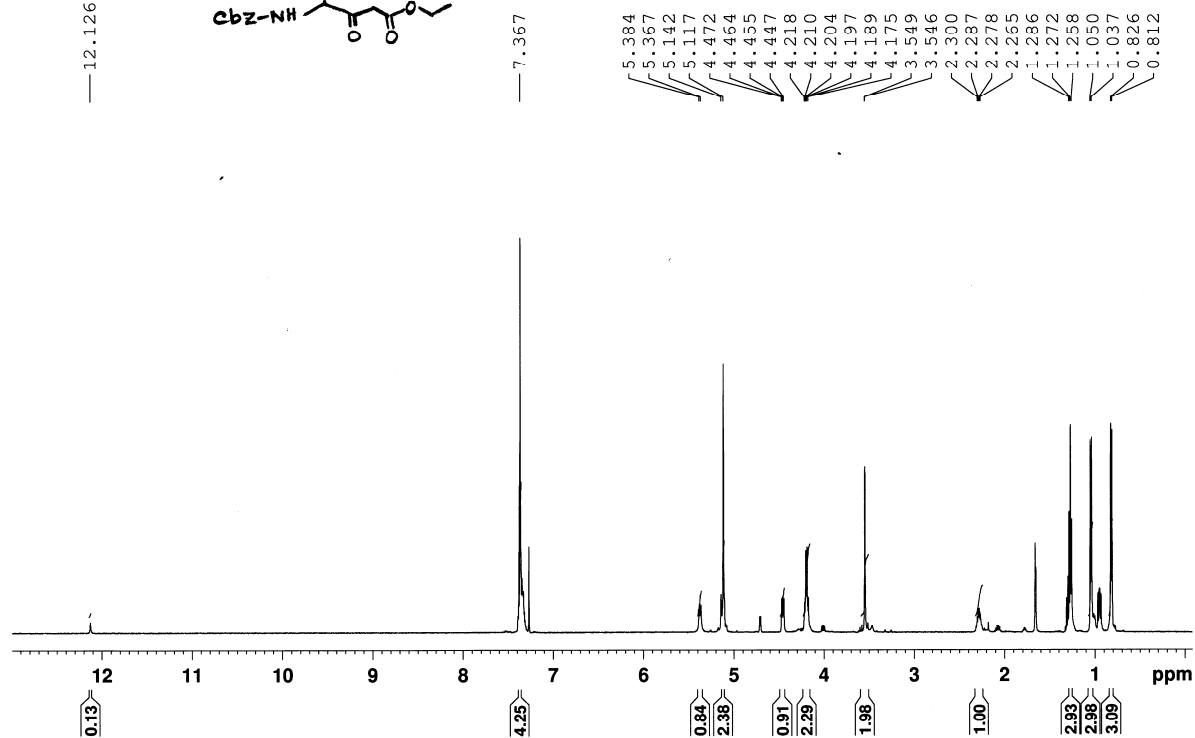

### 4h

AB-Cbz-Val-BK  
13C CDC13  
270409-03

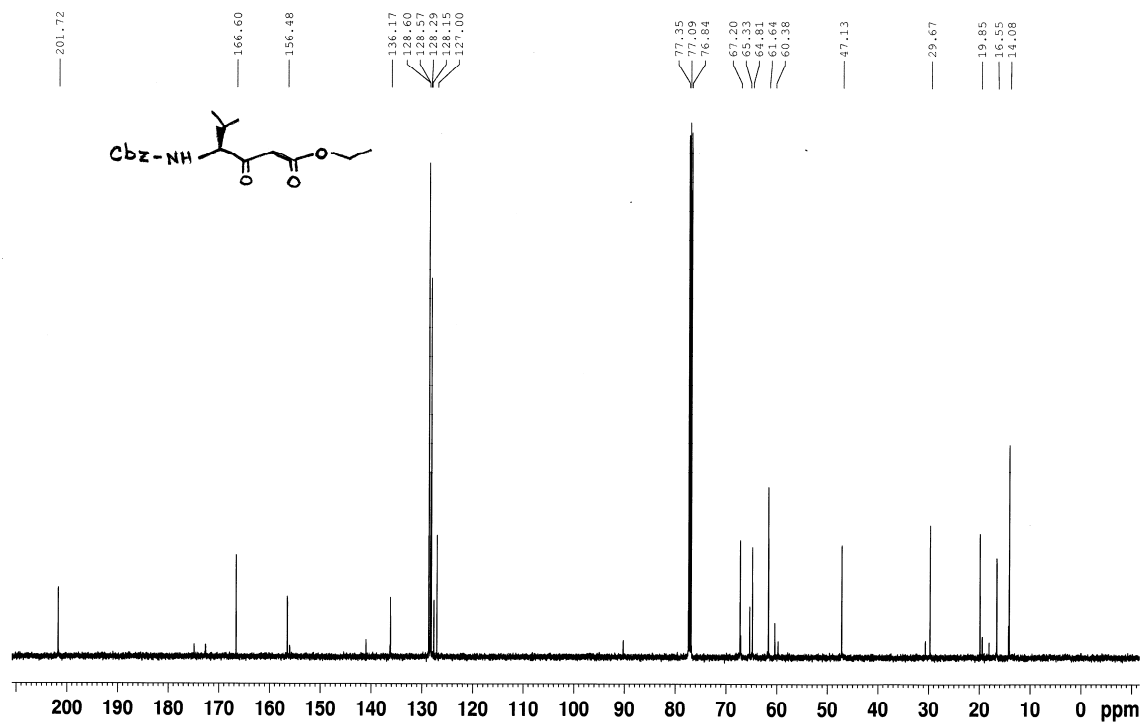

4h

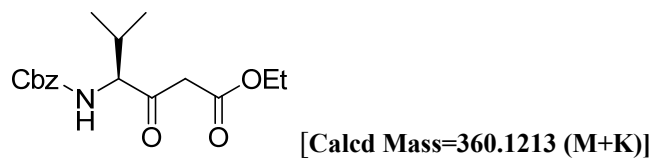

Spectrum Report

Z-val BK

Final - Shots 500 - MAYURA291209; Run #30; Label K1

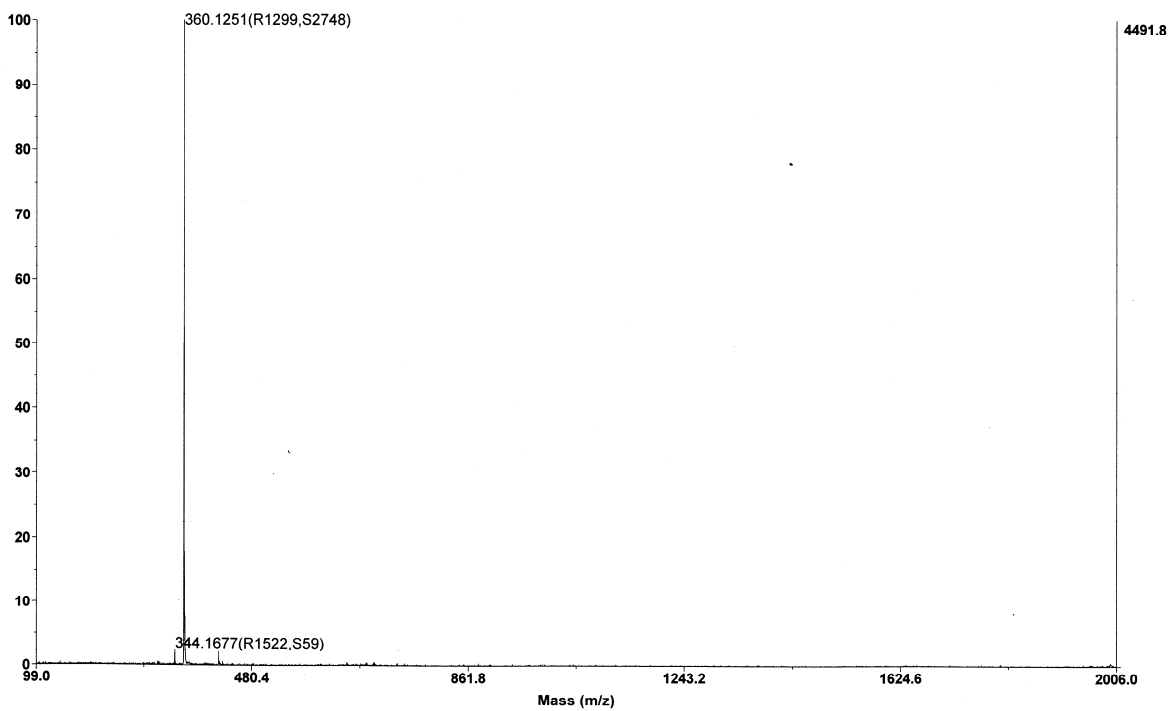

mayuraMAYURA291209 Label K1 Run # 30

Page 1

2/17/2010 2:35:43 PM

4i

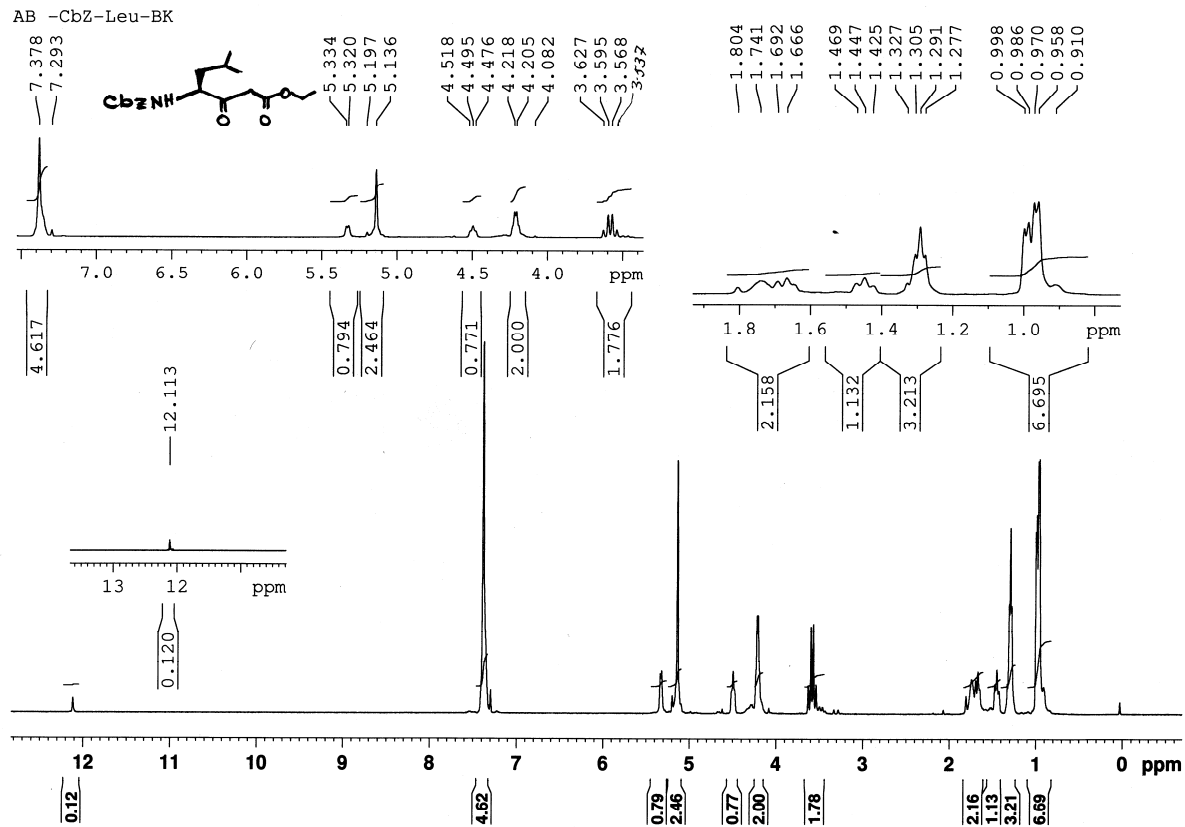

### 4i

AB-Cbz-Leu-RK  
13C CDC13  
270409-02

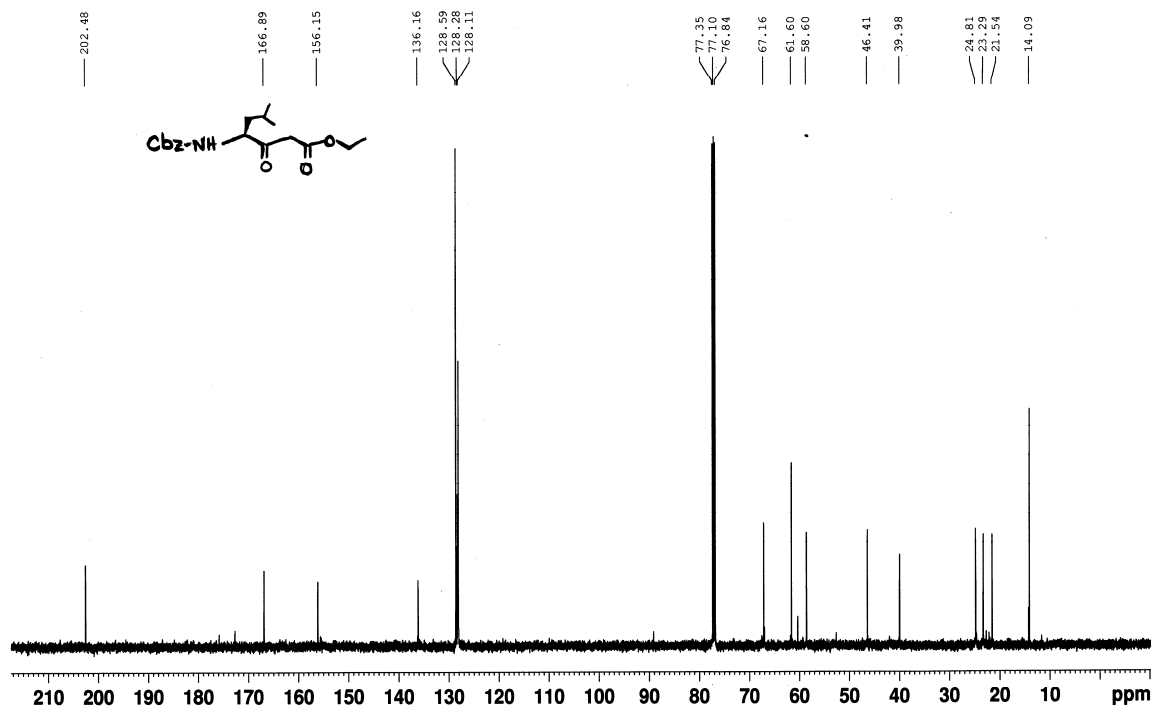

4i

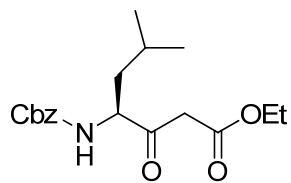

[Calcd mass= 374.1370(M+K)]

Z-Leu-βK

Spectrum Report

Final - Shots 500 - MAYURA291209; Label H13

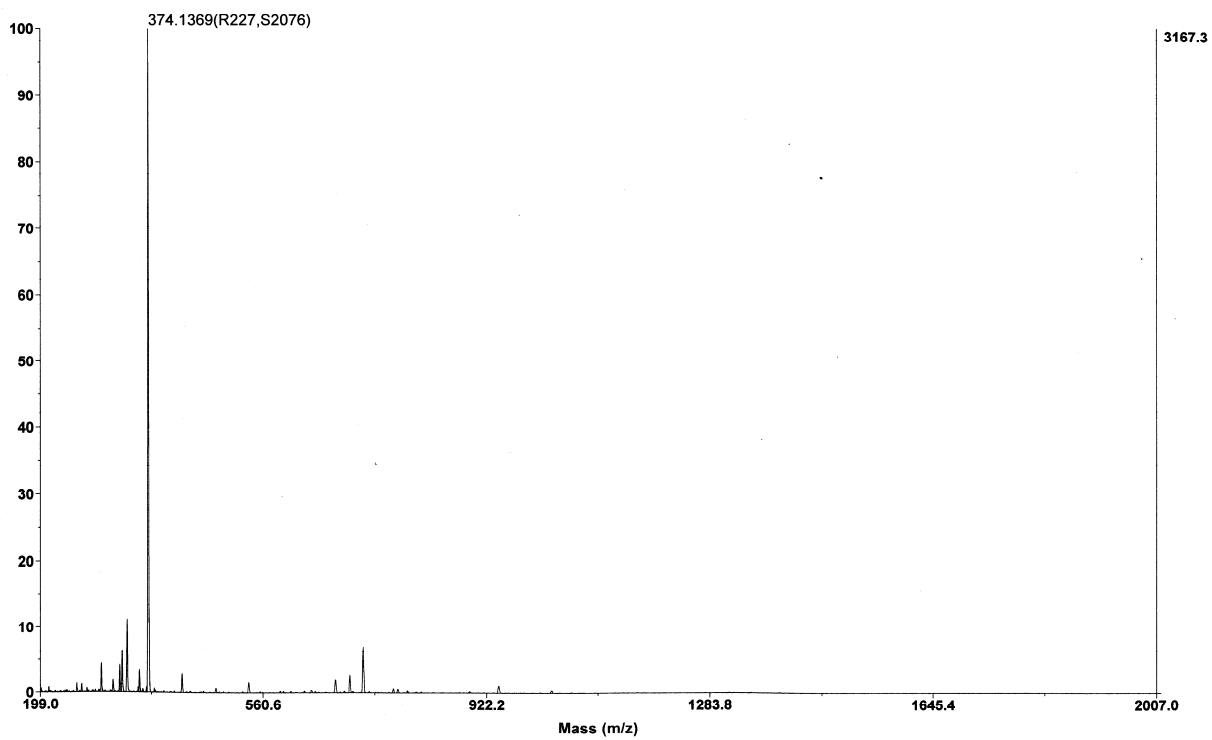

mayuraMAYURA291209 Label H13 Run # 30

Page 1

2/17/2010 4:31:23 PM

4j

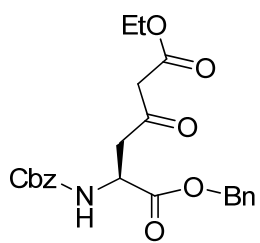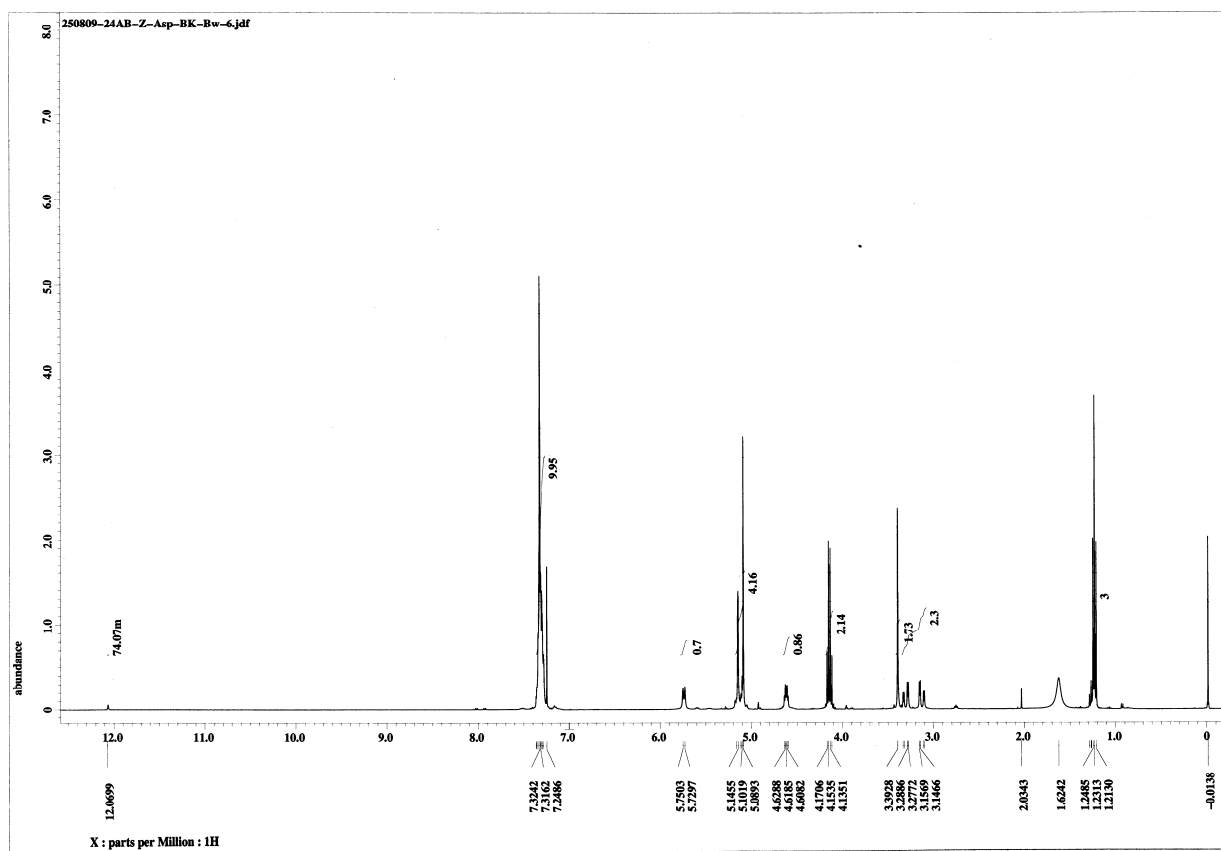



4j

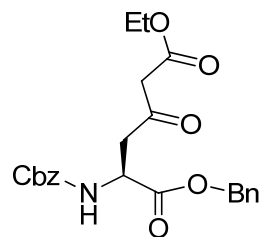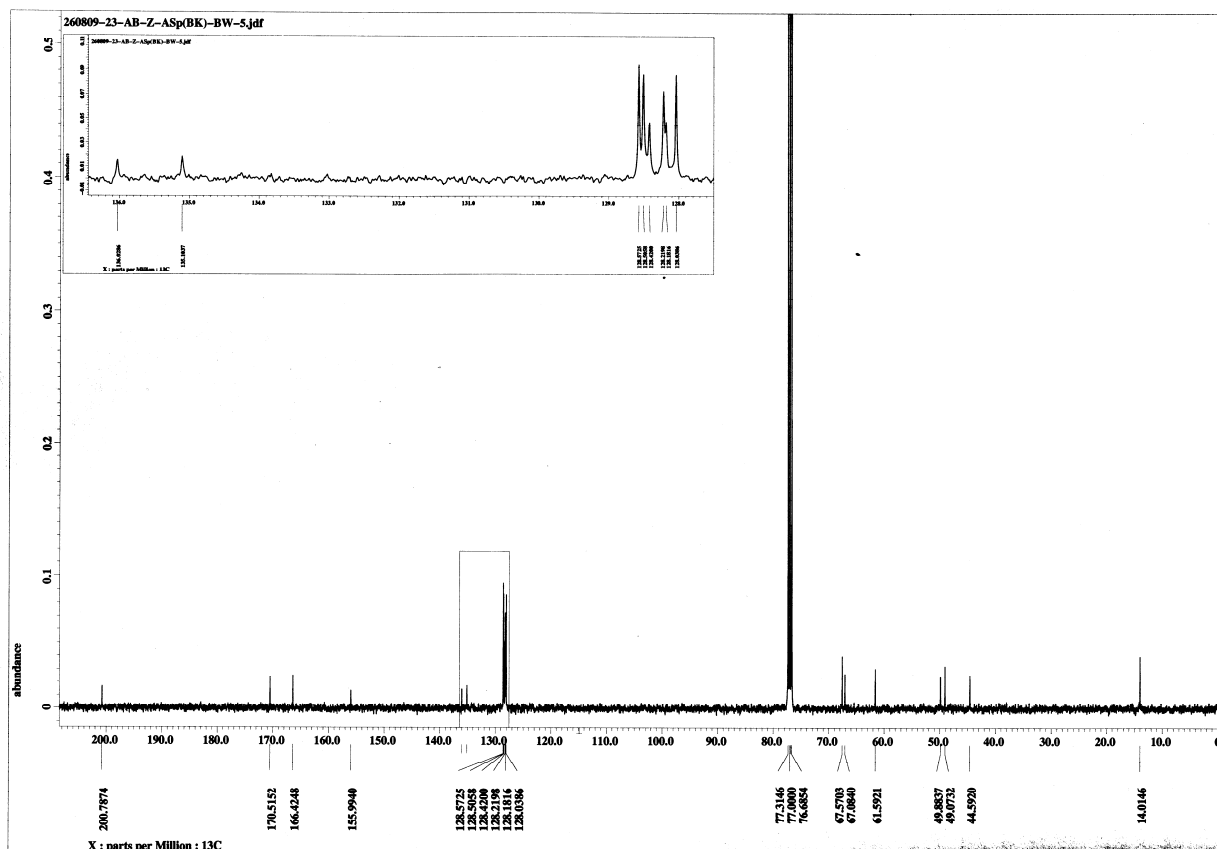

4j

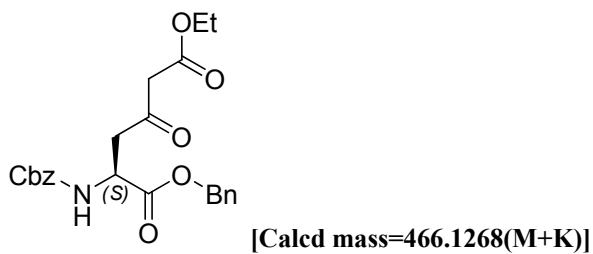

Z-Asp(Bn)-OEt

Spectrum Report

Final - Shots 500 - MAYURA291209; Label J10

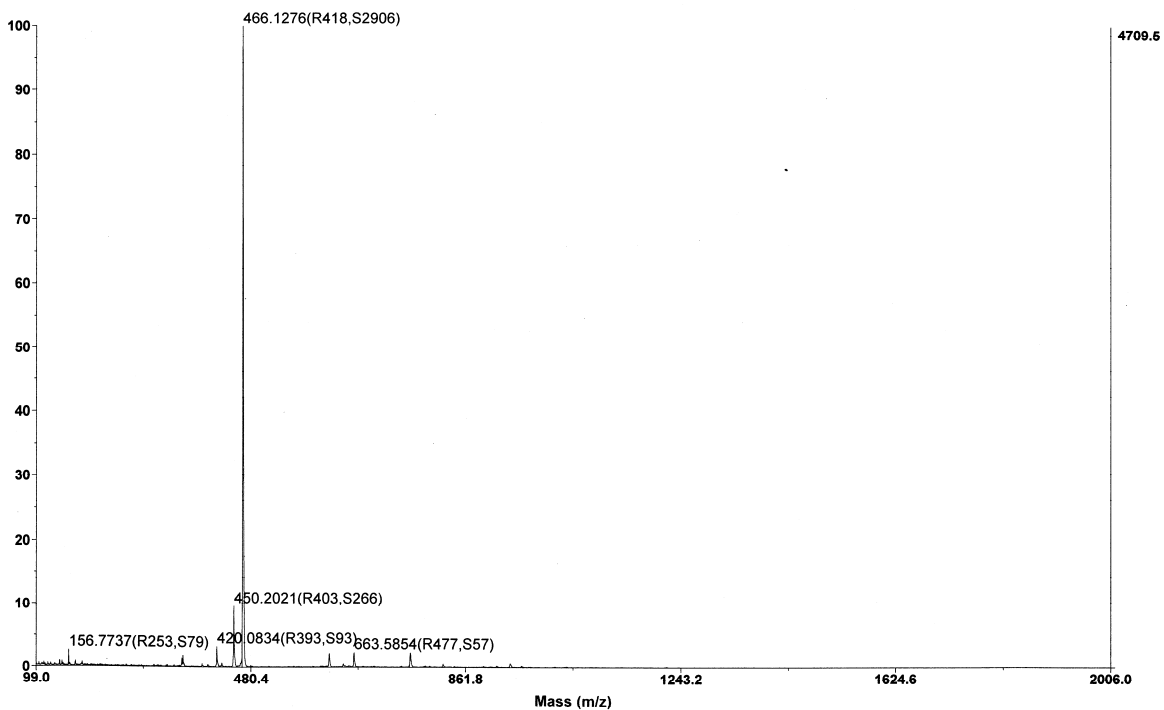

mayuraMAYURA291209 Label J10 Run # 30

Page 1

2/17/2010 2:29:17 PM

4k

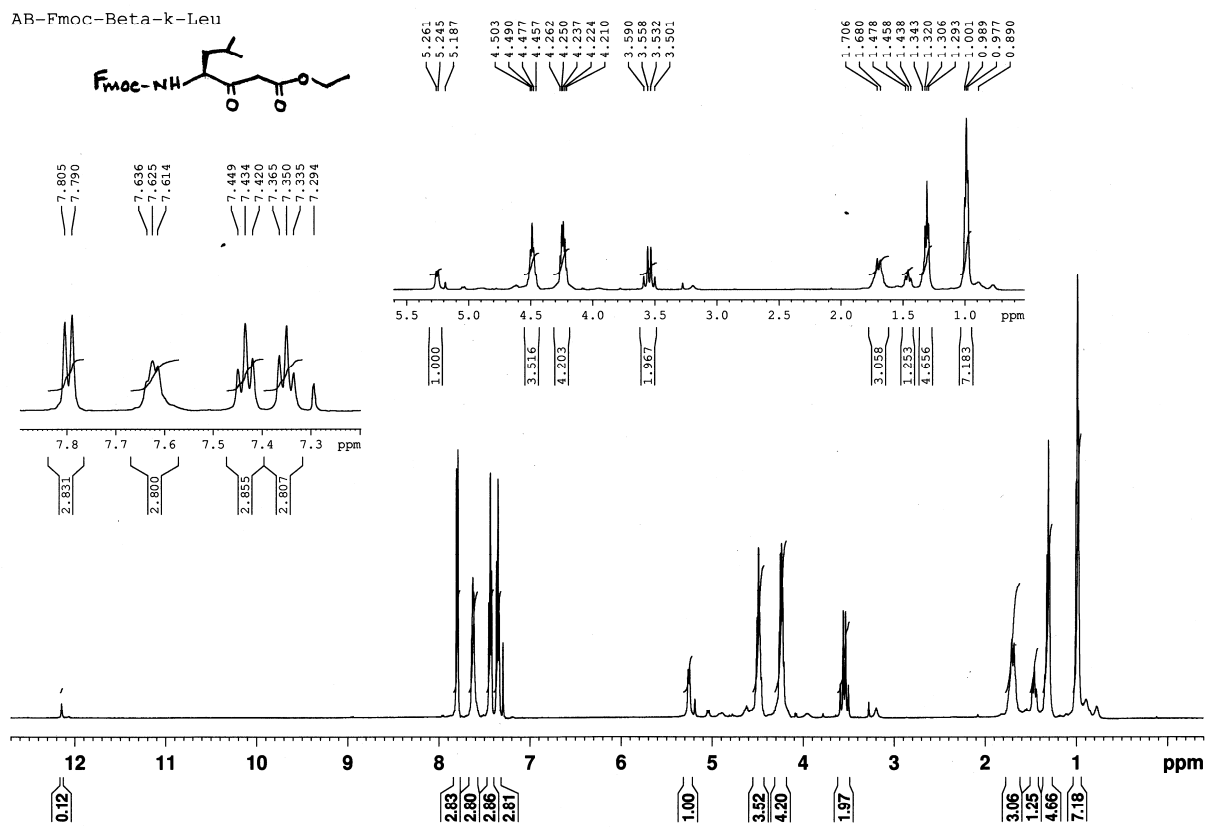

### 4k

202.54 AB-Foc-Leu-BK  
13C CDCl<sub>3</sub>  
270409-06

166.91

156.13

143.77

143.72

141.38

127.78

127.11

125.08

125.02

120.05

77.35

77.09

76.84

66.87

61.53

60.99

58.56

47.28

46.35

39.93

24.80

23.33

22.73

21.54

14.26

14.13

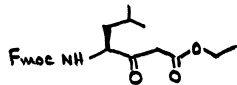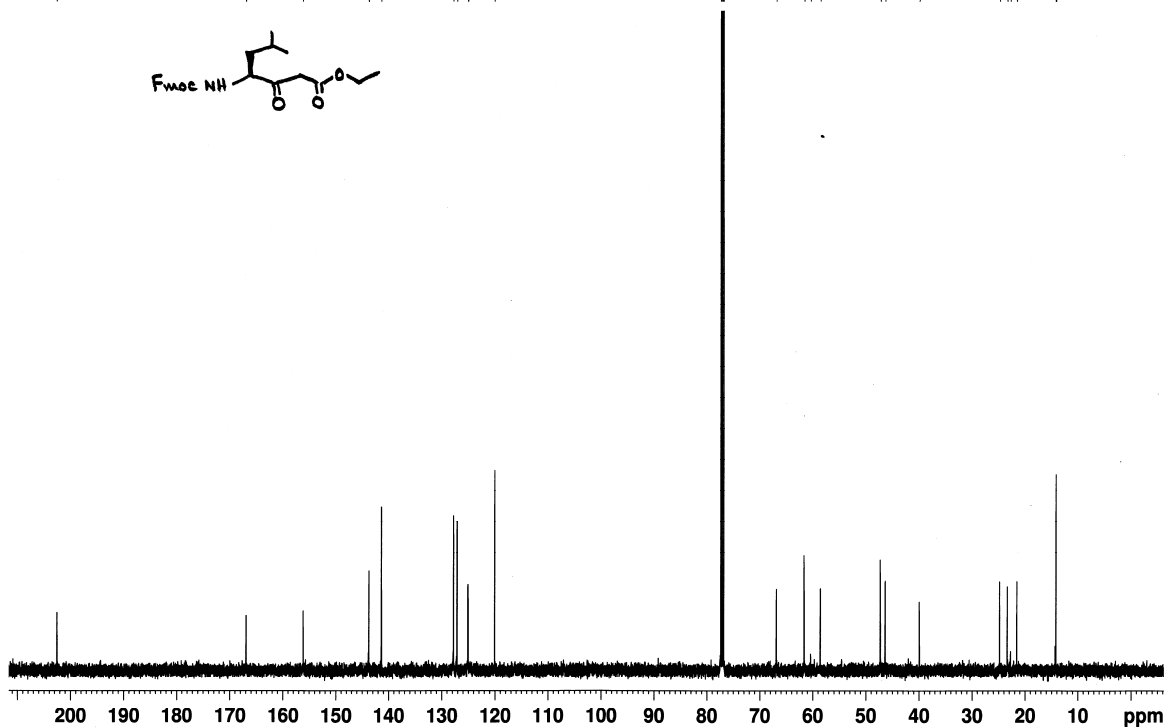

4k

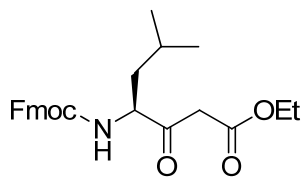

Fmoc-Leu-BK

Spectrum Report

Final - Shots 500 - MAYURA291209; Run #30; Label K5

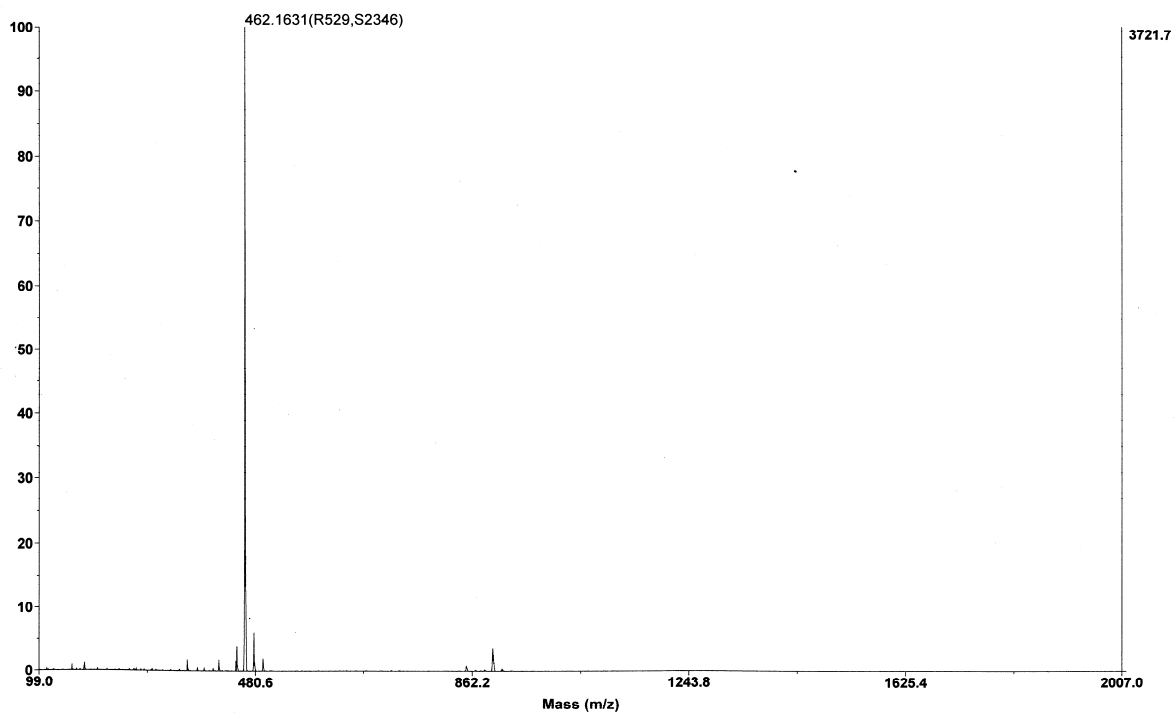

mayuraMAYURA291209 Label K5 Run # 30

Page 1

2/17/2010 4:43:24 PM

4I

AB -Fmoc-Asp(tBu)-BK  
1H CDCl3  
110509-69

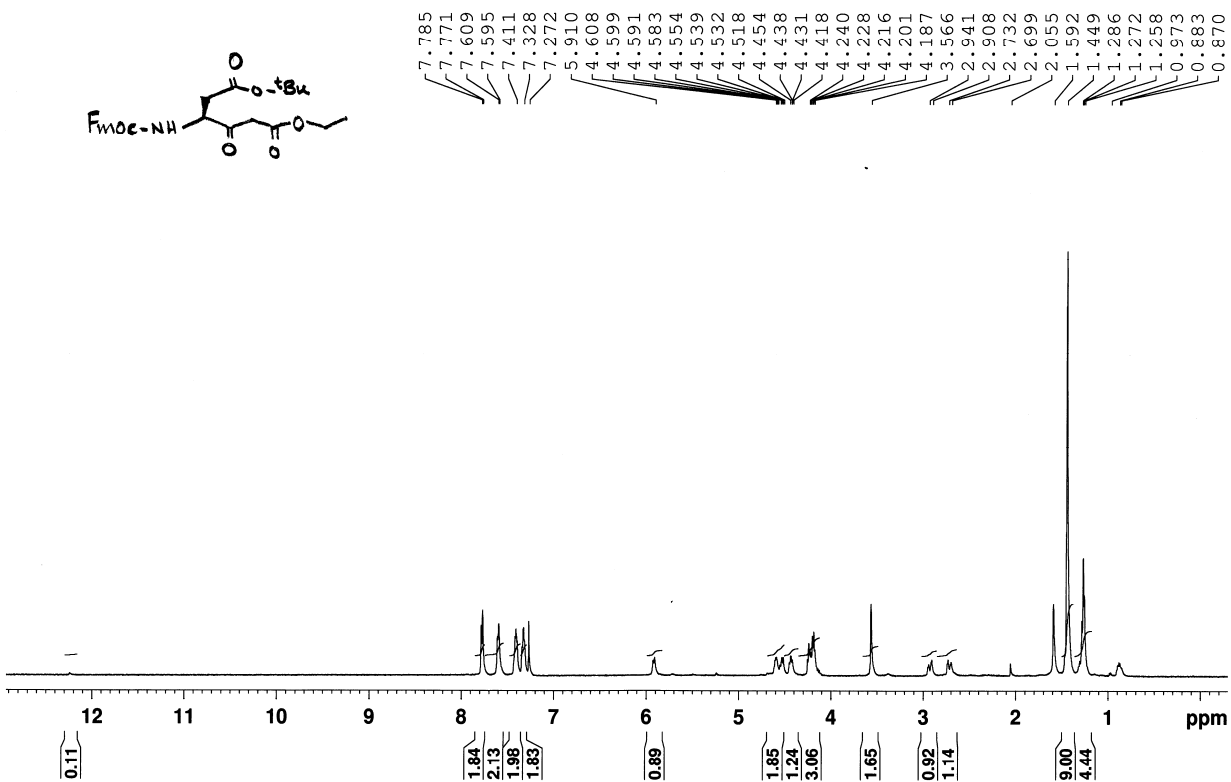

41

AB -Fmoc-Asp(tBu)-BK  
13C CDC13  
120509-26

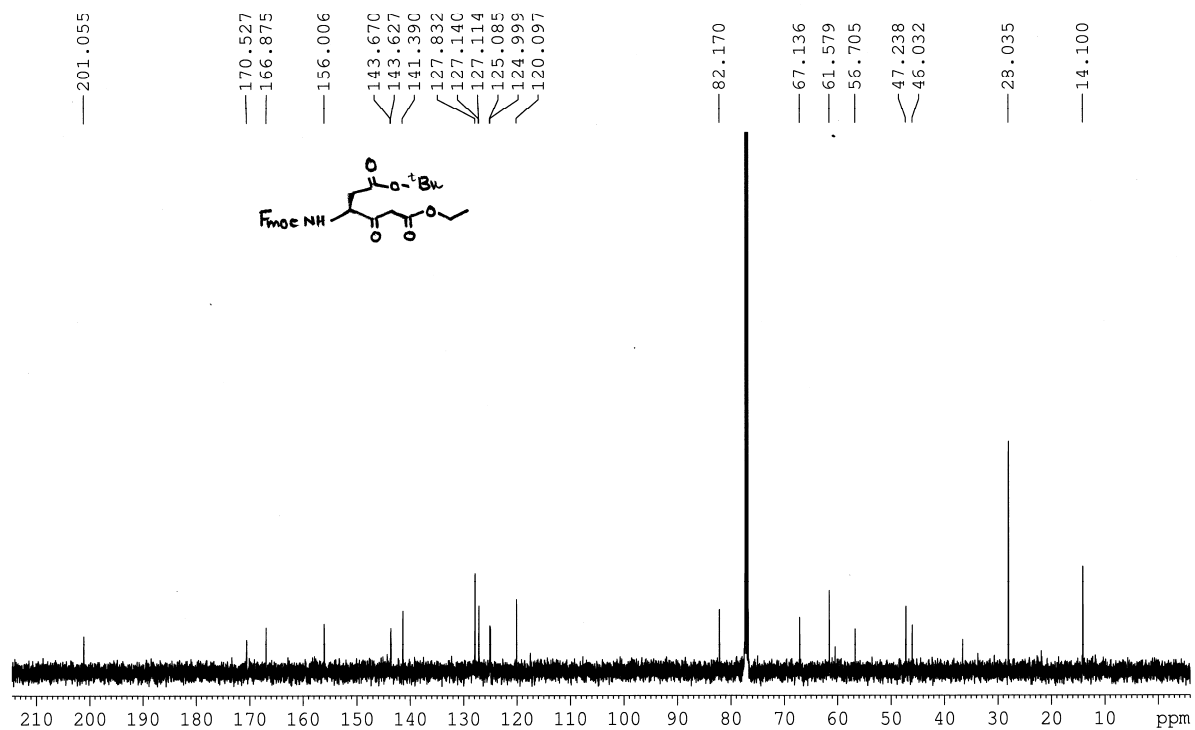

41

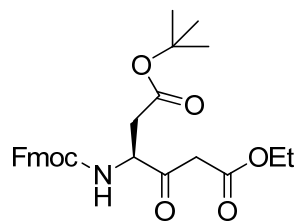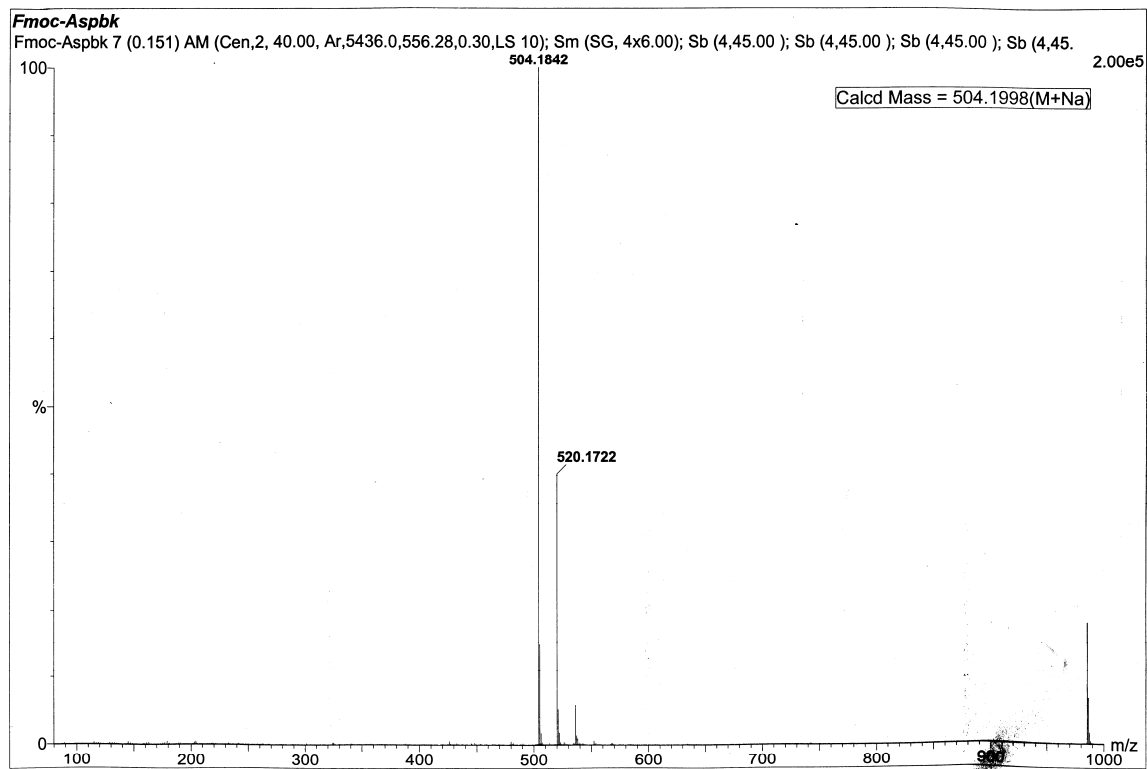



4m

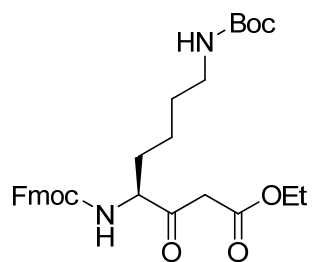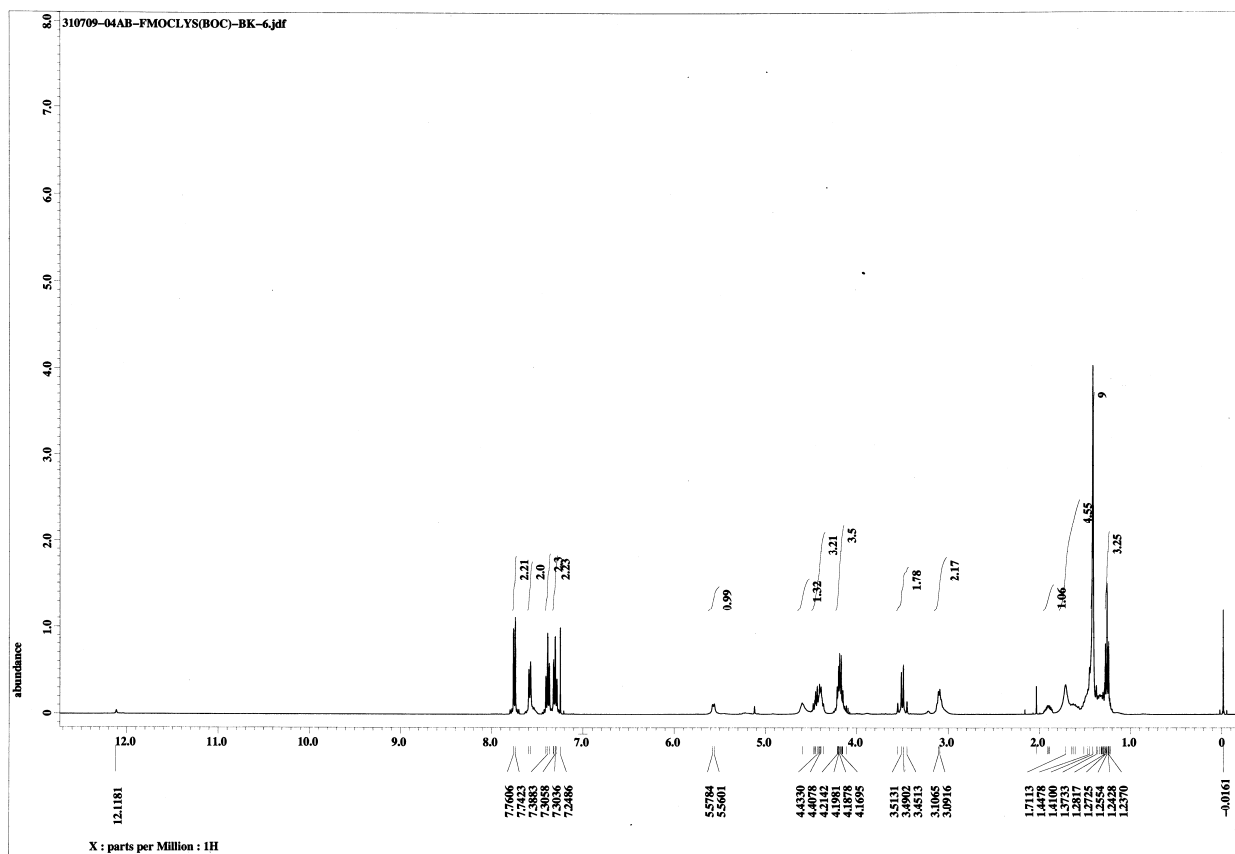

4m

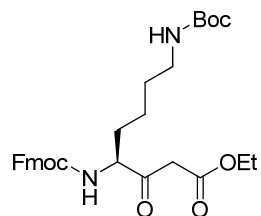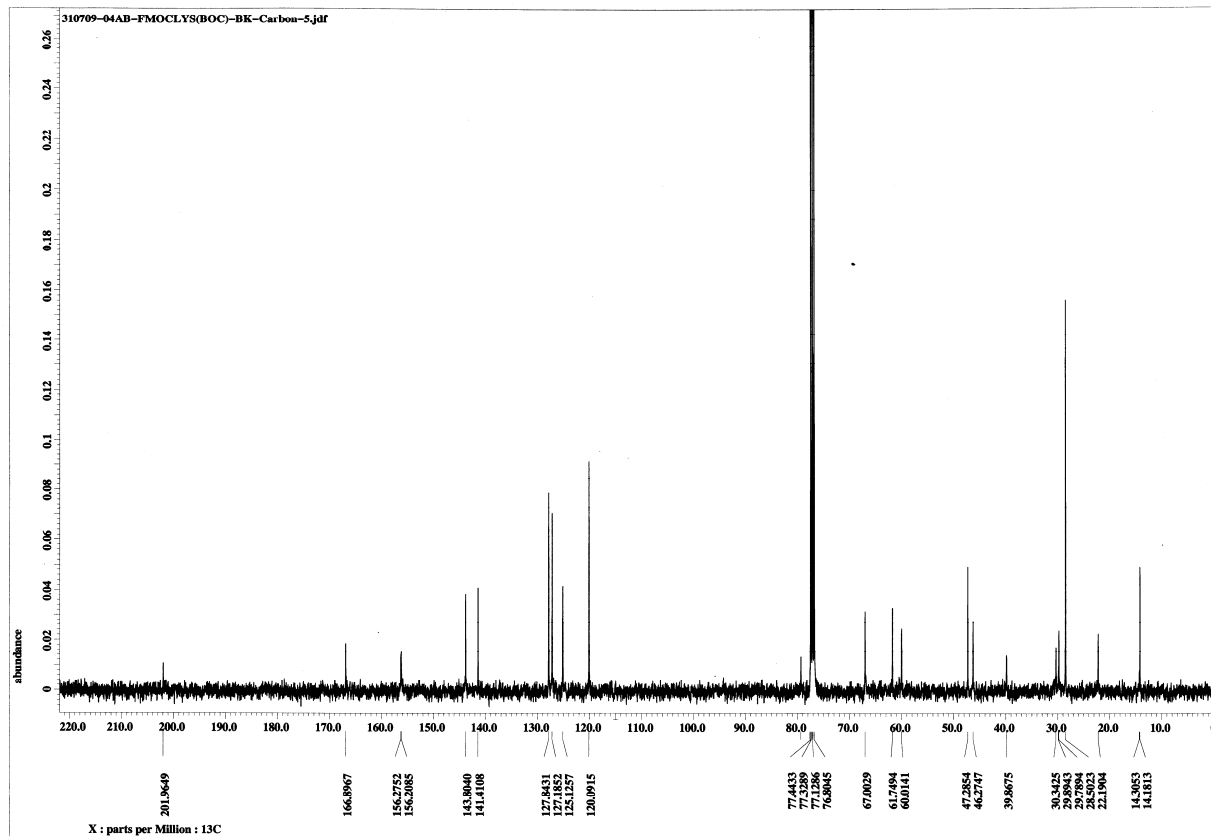

4m

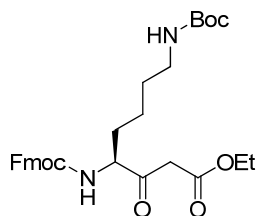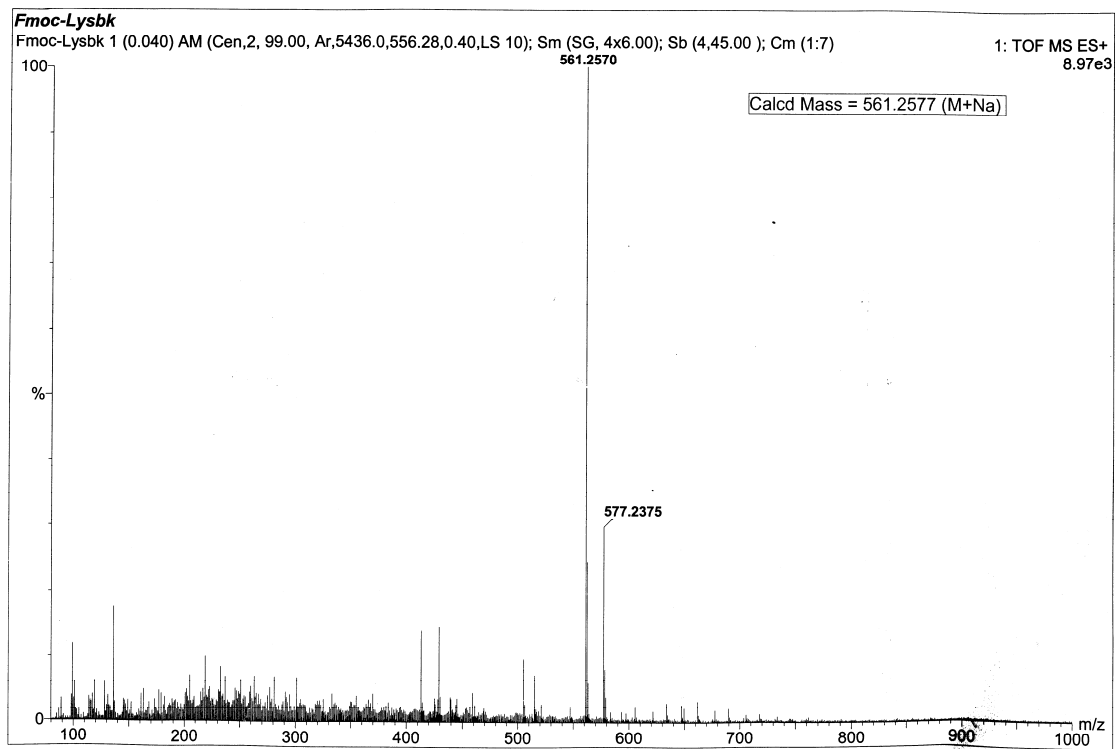

4n

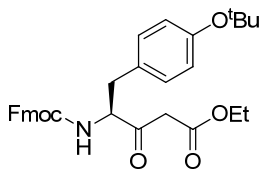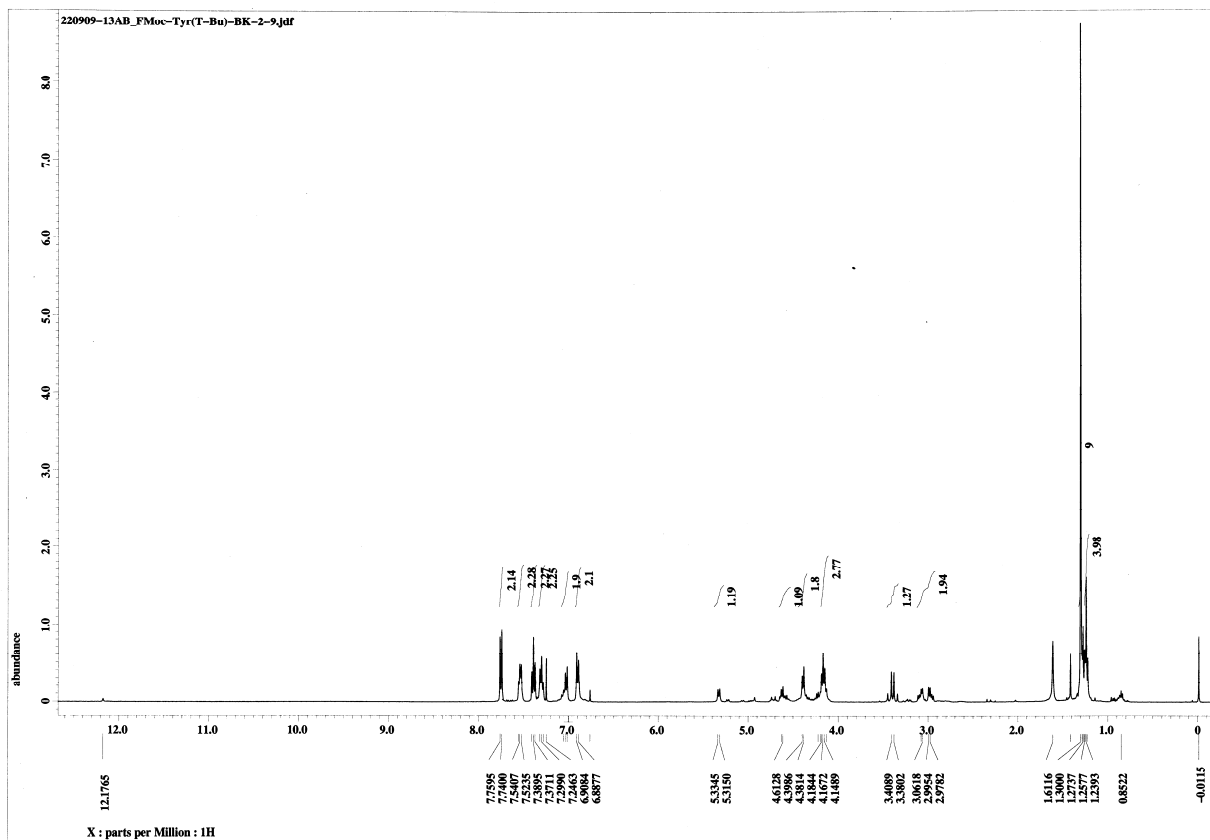

4n

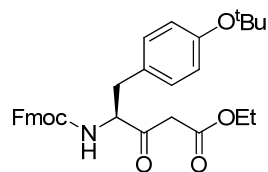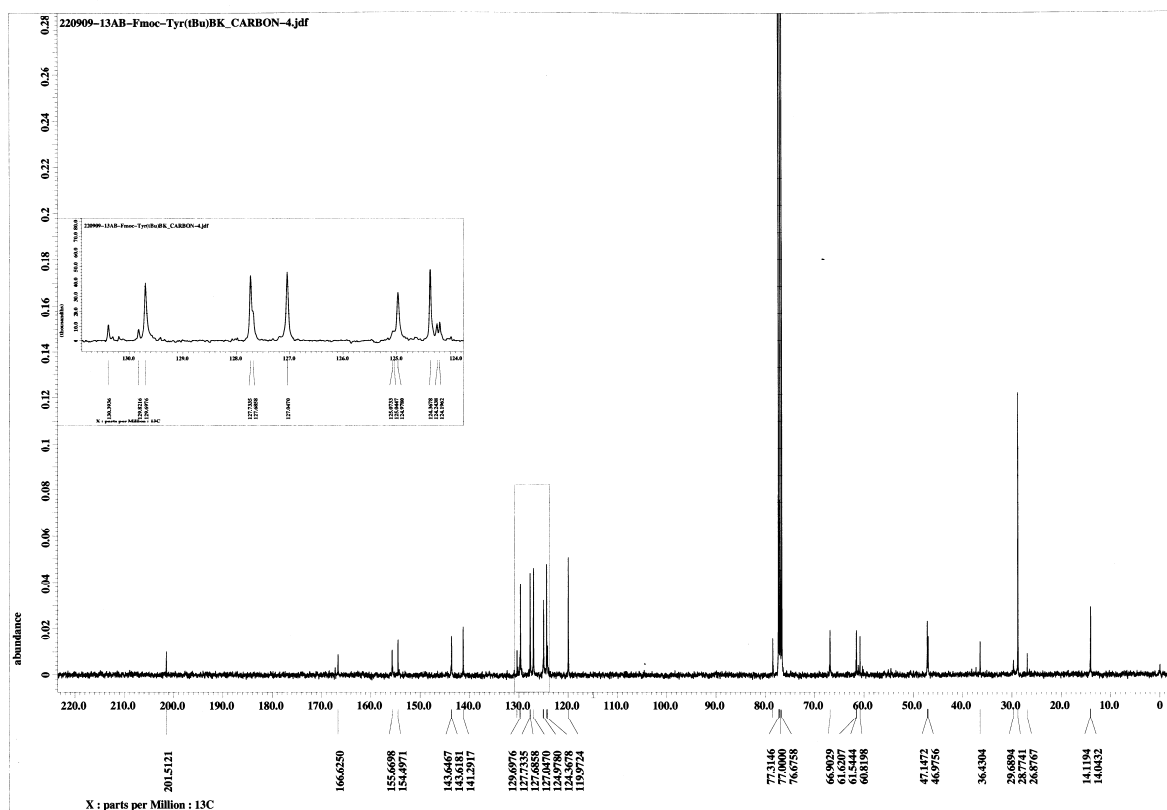

4n

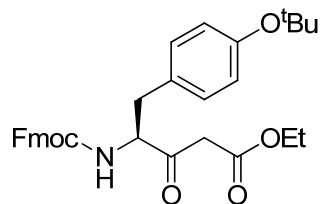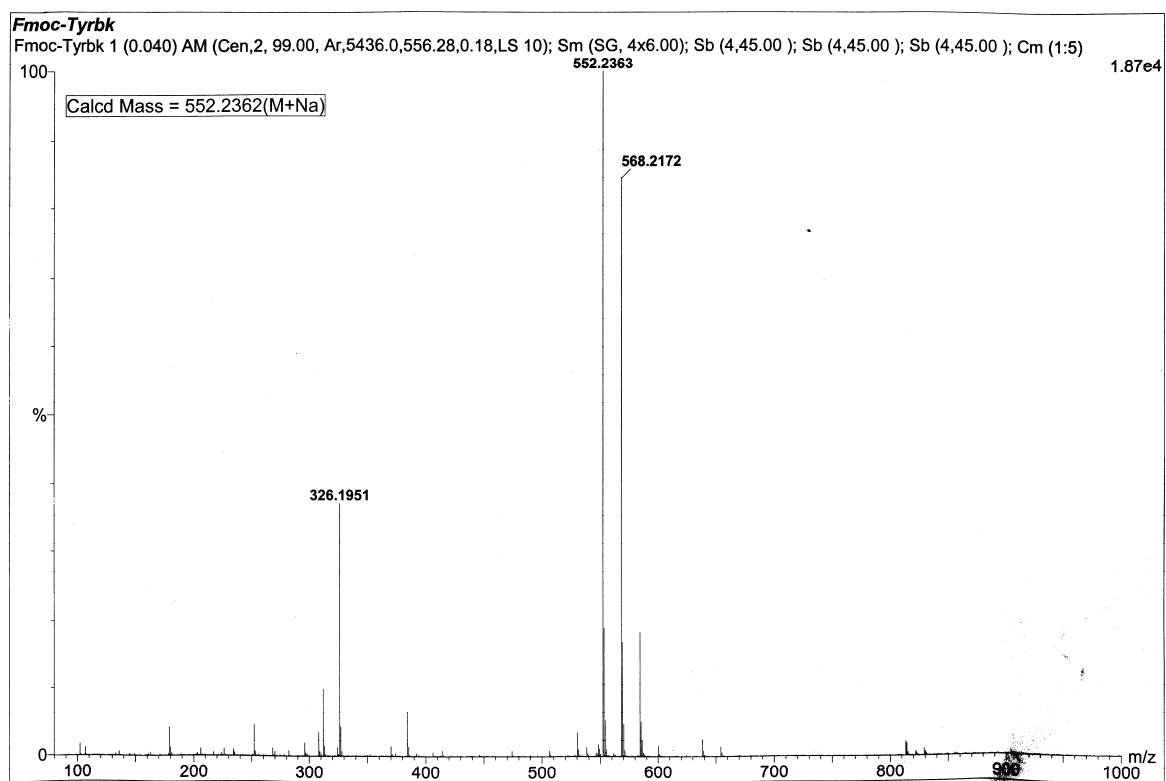

Temperature Experiment of **4a** in CDCl<sub>3</sub>: The peak at  $\delta$  12.1 ppm indicating the existence of enol form of  $\beta$ -keto ester at various temperatures.

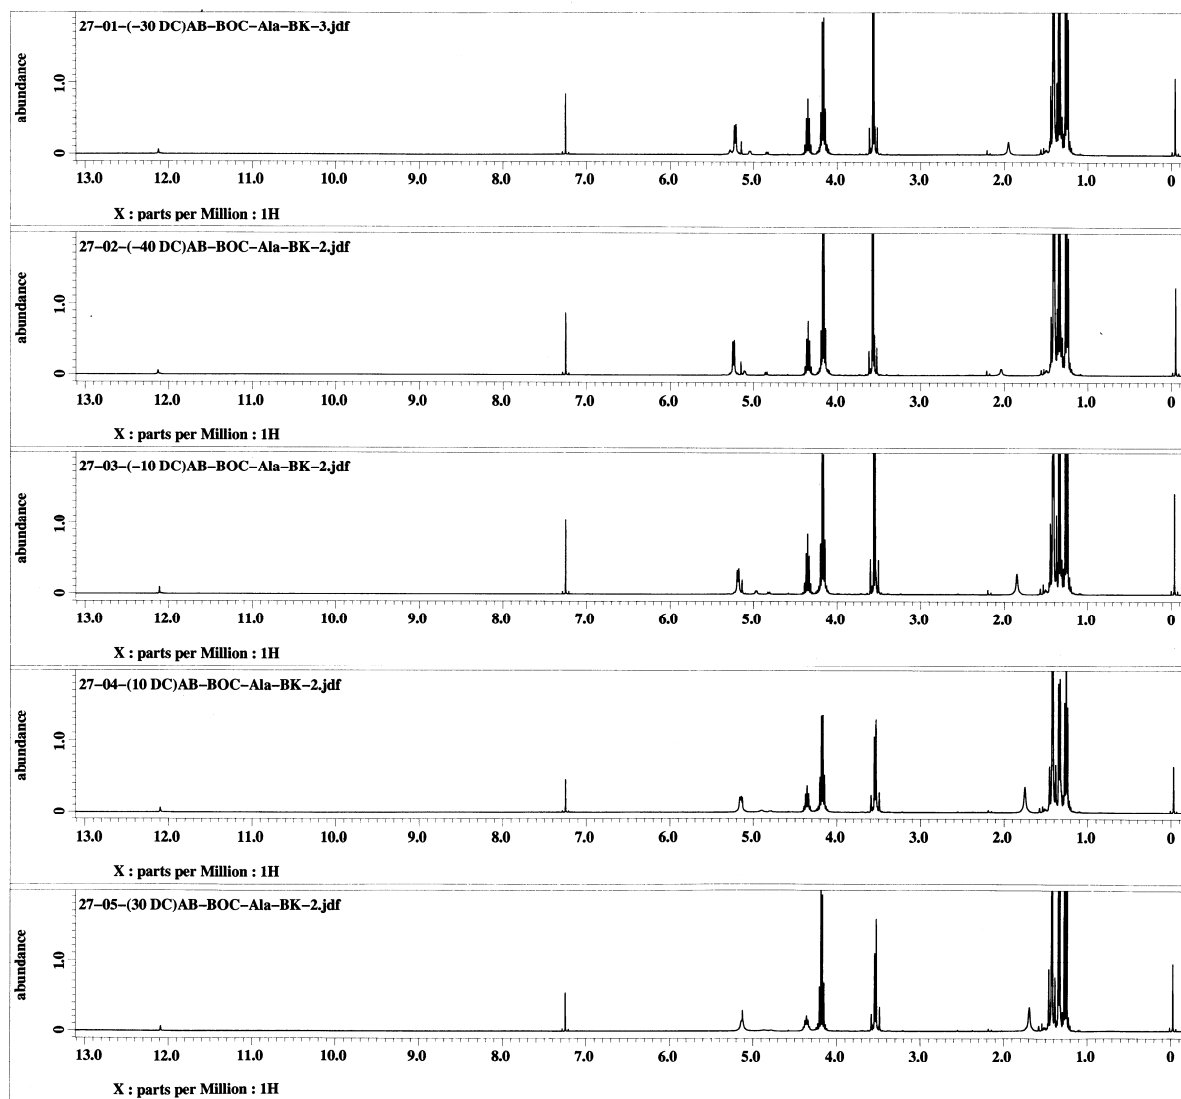

Supplement: c0ob00199f.pdf [file c0ob00199f.pdf]
